# Supplementary material for: NFATc2 enhances tumor-initiating phenotypes through the NFATc2/SOX2/ALDH axis in lung adenocarcinoma
Source: eLife. 2017 Jul 24;6:e26733. doi: 10.7554/eLife.26733 (PMC5570574; doi:10.7554/eLife.26733)
Supplement: Figure 1—source data 1. — DOI: http://dx.doi.org/10.7554/eLife.26733.004 [file elife-26733-fig1-data1.xlsx]

## Sheet: Sheet1
	Relative mRNA expression level
	Group A	Group B
Cases No.	Normal	Tumor
1	1	0.547158
2	417.774	1780.92
3	1.59804	2155.46
4	2760.63	4395.19
5	0.958106	8198.37
6	351.061	1990.3
7	203.084	2568.97
8	32.0263	1.68008
9	704.112	107.617
10	61.0553	1.67072
11	35.0084	9.68832
12	357.368	5579.48
13	46.0064	8055.31
14	4.78962	212.766
15	1.55497	196.435
16	397.611	3134.46
17	932.569	135.687
18	2468.52	3699.41
19	101.885	683.602
20	0.321441	16169.7
21	788.854	558.359
22	31.6517	1899.7
23	87.5757	920.689
24	402.386	951.866
25	1.04375	1015.87
26	898.235	1992.05
27	201.51	0.206032
28	135.669	156.791
Statistical analysis performed by GraphPad Prism 7.0
Column A	Normal
vs.	vs.
Column B	Tumor
Wilcoxon matched-pairs signed rank test
P value	0.0003
Exact or approximate P value?	Exact
P value summary	***
Significantly different (P < 0.05)?	Yes
One- or two-tailed P value?	Two-tailed
Sum of positive, negative ranks	54 , -352
Sum of signed ranks (W)	-298
Number of pairs	28
