# Supplementary material for: NFATc2 enhances tumor-initiating phenotypes through the NFATc2/SOX2/ALDH axis in lung adenocarcinoma
Source: eLife. 2017 Jul 24;6:e26733. doi: 10.7554/eLife.26733 (PMC5570574; doi:10.7554/eLife.26733)
Supplement: Figure 3—source data 1. — DOI: http://dx.doi.org/10.7554/eLife.26733.010 [file elife-26733-fig3-data1.xlsx]

## Sheet: Figure 3A
Days	Tumor volume
	Sh-Ctrl				Sh-NFATc2-A				Sh-NFATc2-B
14	5	0	5	5	0	0	0	0	0	0	0	0
19	10	3	10	10	0	0	0	0	0	0	0	0
21	20	5	20	15	0	0	5	0	0	0	0	0
24	40	7.13611	40.6233	30	0	30	15	0	0	0	0	0
31	70.0096	51.2442	70.4534	45.7342	0	65.4535	32.7791	0	0	0	0	0
35	79.3728	72.9216	74.8516	69.125	0	72.3686	38.7685	0	5	0	0	0
38	104.362	80	114.254	71.9176	0	74.0015	38.6719	0	10	0	0	0
42	175.301	97.0303	148.521	115.2	5	87.25	45.254	5	15	0	0	0
49	210.558	189.208	151.078	189.725	8	89.0571	54.2509	10	25.6843	0	0	29.7419
52	232.909	260.699	178.013	219.375	11.2528	151.598	70.875	13.4694	40.432	27.648	0	59.2798
56	327.98	316.54	245.285	392.766	13.7781	215.165	81.792	18.5928	52.92	36.3258	0	70.3108
63	490.103	325.945	355.224	327.014	18.7749	331.068	94.7408	18.225	55.4764	81.8351	0	86.2558
Calculated by GraphPad Prism7.0
Table Analyzed	Figure 2H
Two-way RM ANOVA	Matching: Stacked
Alpha	0.05
Source of Variation	% of total variation	P value	P value summary	Significant?
Interaction	22.61	<0.0001	****	Yes
Time	36.38	<0.0001	****	Yes
Column Factor	27.25	0.0004	***	Yes
Subjects (matching)	5.614	<0.0001	****	Yes
ANOVA table	SS	DF	MS	F (DFn, DFd)	P value
Interaction	290105	22	13187	F (22, 99) = 12.48	P<0.0001
Time	466875	11	42443	F (11, 99) = 40.16	P<0.0001
Column Factor	349651	2	174825	F (2, 9) = 21.84	P=0.0004
Subjects (matching)	72050	9	8006	F (9, 99) = 7.574	P<0.0001
Residual	104641	99	1057
Number of missing values	0
Within each row, compare columns (simple effects within rows)
Number of families	12
Number of comparisons per family	3
Alpha	0.05
Tukey's multiple comparisons test	Mean Diff.	95.00% CI of diff.	Significant?	Summary	Adjusted P Value
14
Sh-Ctrl vs. Sh-NFATc2-A	3.75	-64.22 to 71.72	No	ns	0.9906
Sh-Ctrl vs. Sh-NFATc2-B	3.75	-64.22 to 71.72	No	ns	0.9906
Sh-NFATc2-A vs. Sh-NFATc2-B	0	-67.97 to 67.97	No	ns	>0.9999
19
Sh-Ctrl vs. Sh-NFATc2-A	8.25	-59.72 to 76.22	No	ns	0.9552
Sh-Ctrl vs. Sh-NFATc2-B	8.25	-59.72 to 76.22	No	ns	0.9552
Sh-NFATc2-A vs. Sh-NFATc2-B	0	-67.97 to 67.97	No	ns	>0.9999
21
Sh-Ctrl vs. Sh-NFATc2-A	13.75	-54.22 to 81.72	No	ns	0.8805
Sh-Ctrl vs. Sh-NFATc2-B	15	-52.97 to 82.97	No	ns	0.8596
Sh-NFATc2-A vs. Sh-NFATc2-B	1.25	-66.72 to 69.22	No	ns	0.9989
24
Sh-Ctrl vs. Sh-NFATc2-A	18.19	-49.78 to 86.16	No	ns	0.8006
Sh-Ctrl vs. Sh-NFATc2-B	29.44	-38.53 to 97.41	No	ns	0.5601
Sh-NFATc2-A vs. Sh-NFATc2-B	11.25	-56.72 to 79.22	No	ns	0.9183
31
Sh-Ctrl vs. Sh-NFATc2-A	34.8	-33.17 to 102.8	No	ns	0.4459
Sh-Ctrl vs. Sh-NFATc2-B	59.36	-8.609 to 127.3	No	ns	0.0998
Sh-NFATc2-A vs. Sh-NFATc2-B	24.56	-43.41 to 92.53	No	ns	0.6674
35
Sh-Ctrl vs. Sh-NFATc2-A	46.28	-21.69 to 114.3	No	ns	0.2424
Sh-Ctrl vs. Sh-NFATc2-B	72.82	4.849 to 140.8	Yes	*	0.0327
Sh-NFATc2-A vs. Sh-NFATc2-B	26.53	-41.43 to 94.5	No	ns	0.624
38
Sh-Ctrl vs. Sh-NFATc2-A	64.47	-3.504 to 132.4	No	ns	0.0669
Sh-Ctrl vs. Sh-NFATc2-B	90.13	22.16 to 158.1	Yes	**	0.0059
Sh-NFATc2-A vs. Sh-NFATc2-B	25.67	-42.3 to 93.64	No	ns	0.6431
42
Sh-Ctrl vs. Sh-NFATc2-A	98.39	30.42 to 166.4	Yes	**	0.0024
Sh-Ctrl vs. Sh-NFATc2-B	130.3	62.29 to 198.2	Yes	****	<0.0001
Sh-NFATc2-A vs. Sh-NFATc2-B	31.88	-36.09 to 99.84	No	ns	0.5072
49
Sh-Ctrl vs. Sh-NFATc2-A	144.8	76.85 to 212.8	Yes	****	<0.0001
Sh-Ctrl vs. Sh-NFATc2-B	171.3	103.3 to 239.3	Yes	****	<0.0001
Sh-NFATc2-A vs. Sh-NFATc2-B	26.47	-41.5 to 94.44	No	ns	0.6254
52
Sh-Ctrl vs. Sh-NFATc2-A	161	92.98 to 228.9	Yes	****	<0.0001
Sh-Ctrl vs. Sh-NFATc2-B	190.9	122.9 to 258.9	Yes	****	<0.0001
Sh-NFATc2-A vs. Sh-NFATc2-B	29.96	-38.01 to 97.93	No	ns	0.5487
56
Sh-Ctrl vs. Sh-NFATc2-A	238.3	170.3 to 306.3	Yes	****	<0.0001
Sh-Ctrl vs. Sh-NFATc2-B	280.8	212.8 to 348.7	Yes	****	<0.0001
Sh-NFATc2-A vs. Sh-NFATc2-B	42.44	-25.53 to 110.4	No	ns	0.3026
63
Sh-Ctrl vs. Sh-NFATc2-A	258.9	190.9 to 326.8	Yes	****	<0.0001
Sh-Ctrl vs. Sh-NFATc2-B	318.7	250.7 to 386.6	Yes	****	<0.0001
Sh-NFATc2-A vs. Sh-NFATc2-B	59.81	-8.159 to 127.8	No	ns	0.0964
Test details	Mean 1	Mean 2	Mean Diff.	SE of diff.	N1	N2	q	DF
14
Sh-Ctrl vs. Sh-NFATc2-A	3.75	0	3.75	28.6	4	4	0.1854	108
Sh-Ctrl vs. Sh-NFATc2-B	3.75	0	3.75	28.6	4	4	0.1854	108
Sh-NFATc2-A vs. Sh-NFATc2-B	0	0	0	28.6	4	4	0	108
19
Sh-Ctrl vs. Sh-NFATc2-A	8.25	0	8.25	28.6	4	4	0.4079	108
Sh-Ctrl vs. Sh-NFATc2-B	8.25	0	8.25	28.6	4	4	0.4079	108
Sh-NFATc2-A vs. Sh-NFATc2-B	0	0	0	28.6	4	4	0	108
21
Sh-Ctrl vs. Sh-NFATc2-A	15	1.25	13.75	28.6	4	4	0.6799	108
Sh-Ctrl vs. Sh-NFATc2-B	15	0	15	28.6	4	4	0.7417	108
Sh-NFATc2-A vs. Sh-NFATc2-B	1.25	0	1.25	28.6	4	4	0.06181	108
24
Sh-Ctrl vs. Sh-NFATc2-A	29.44	11.25	18.19	28.6	4	4	0.8994	108
Sh-Ctrl vs. Sh-NFATc2-B	29.44	0	29.44	28.6	4	4	1.456	108
Sh-NFATc2-A vs. Sh-NFATc2-B	11.25	0	11.25	28.6	4	4	0.5563	108
31
Sh-Ctrl vs. Sh-NFATc2-A	59.36	24.56	34.8	28.6	4	4	1.721	108
Sh-Ctrl vs. Sh-NFATc2-B	59.36	0	59.36	28.6	4	4	2.935	108
Sh-NFATc2-A vs. Sh-NFATc2-B	24.56	0	24.56	28.6	4	4	1.214	108
35
Sh-Ctrl vs. Sh-NFATc2-A	74.07	27.78	46.28	28.6	4	4	2.289	108
Sh-Ctrl vs. Sh-NFATc2-B	74.07	1.25	72.82	28.6	4	4	3.601	108
Sh-NFATc2-A vs. Sh-NFATc2-B	27.78	1.25	26.53	28.6	4	4	1.312	108
38
Sh-Ctrl vs. Sh-NFATc2-A	92.63	28.17	64.47	28.6	4	4	3.188	108
Sh-Ctrl vs. Sh-NFATc2-B	92.63	2.5	90.13	28.6	4	4	4.457	108
Sh-NFATc2-A vs. Sh-NFATc2-B	28.17	2.5	25.67	28.6	4	4	1.269	108
42
Sh-Ctrl vs. Sh-NFATc2-A	134	35.63	98.39	28.6	4	4	4.865	108
Sh-Ctrl vs. Sh-NFATc2-B	134	3.75	130.3	28.6	4	4	6.441	108
Sh-NFATc2-A vs. Sh-NFATc2-B	35.63	3.75	31.88	28.6	4	4	1.576	108
49
Sh-Ctrl vs. Sh-NFATc2-A	185.1	40.33	144.8	28.6	4	4	7.161	108
Sh-Ctrl vs. Sh-NFATc2-B	185.1	13.86	171.3	28.6	4	4	8.469	108
Sh-NFATc2-A vs. Sh-NFATc2-B	40.33	13.86	26.47	28.6	4	4	1.309	108
52
Sh-Ctrl vs. Sh-NFATc2-A	222.7	61.8	161	28.6	4	4	7.958	108
Sh-Ctrl vs. Sh-NFATc2-B	222.7	31.84	190.9	28.6	4	4	9.44	108
Sh-NFATc2-A vs. Sh-NFATc2-B	61.8	31.84	29.96	28.6	4	4	1.481	108
56
Sh-Ctrl vs. Sh-NFATc2-A	320.6	82.33	238.3	28.6	4	4	11.78	108
Sh-Ctrl vs. Sh-NFATc2-B	320.6	39.89	280.8	28.6	4	4	13.88	108
Sh-NFATc2-A vs. Sh-NFATc2-B	82.33	39.89	42.44	28.6	4	4	2.099	108
63
Sh-Ctrl vs. Sh-NFATc2-A	374.6	115.7	258.9	28.6	4	4	12.8	108
Sh-Ctrl vs. Sh-NFATc2-B	374.6	55.89	318.7	28.6	4	4	15.76	108
Sh-NFATc2-A vs. Sh-NFATc2-B	115.7	55.89	59.81	28.6	4	4	2.957	108

## Sheet: Figure 3B
Days	Tumor volume
	Sh-Ctrl					Sh-NFATc2-A					Sh-NFATc2-B
14	10	5	0	0	0	0	0	0	0	0	0	0	0	0	0
19	0	5	0	0	5	0	0	0	0	0	0	0	0	0	0
21	5	8	5	5	10	0	0	0	0	0	10.4477	0	5	0	0
24	10	10	10	10	15	0	5	0	0	0	13.4936	5	10	5	0
31	22.5355	16.8092	20.8699	18.4954	19.8312	3	9.4294	10	0	0	24.0646	15	16.842	10	0
35	64.5585	86.8798	66.1453	68.8495	42.5602	6	21.7387	17.82	5	5	28.0674	27.556	32.3927	20.1237	8
38	94.4906	104.067	103.446	102.353	73.6512	7.2	31.6795	27.2844	15	8	35.8184	33.6272	38.8242	35.3894	15
42	138.235	149.193	147.375	138.014	131.655	11.7627	33.875	44.6988	30.3966	13.5463	40.1055	30	49.5781	54.7722	20.2248
49	204.186	146.92	196.673	176.009	185.614	15.375	45.204	51.92	40.3877	21.542	41.1531	31.3914	47.3855	41.7396	55.8243
52	234.119	178.444	349.943	238.52	224.79	15.852	52.4433	56.8927	66.9879	24.675	65.1012	53.856	76.4847	62.3423	68.77
Calculated by GraphPad Prism7.0
Table Analyzed	Figure2-figure supplement 3A
Two-way RM ANOVA	Matching: Stacked
Alpha	0.05
Source of Variation	% of total variation	P value	P value summary	Significant?
Interaction	26.91	<0.0001	****	Yes
Time	45.03	<0.0001	****	Yes
Column Factor	22.78	<0.0001	****	Yes
Subjects (matching)	1.007	0.0212	*	Yes
ANOVA table	SS	DF	MS	F (DFn, DFd)	P value
Interaction	138804	18	7711	F (18, 108) = 37.75	P<0.0001
Time	232285	9	25809	F (9, 108) = 126.4	P<0.0001
Column Factor	117510	2	58755	F (2, 12) = 135.8	P<0.0001
Subjects (matching)	5193	12	432.8	F (12, 108) = 2.119	P=0.0212
Residual	22059	108	204.3
Number of missing values	0
Within each row, compare columns (simple effects within rows)
Number of families	10
Number of comparisons per family	3
Alpha	0.05
Tukey's multiple comparisons test	Mean Diff.	95.00% CI of diff.	Significant?	Summary	Adjusted P Value
14
Sh-Ctrl vs. Sh-NFATc2-A	3	-19.62 to 25.62	No	ns	0.9469
Sh-Ctrl vs. Sh-NFATc2-B	3	-19.62 to 25.62	No	ns	0.9469
Sh-NFATc2-A vs. Sh-NFATc2-B	0	-22.62 to 22.62	No	ns	>0.9999
19
Sh-Ctrl vs. Sh-NFATc2-A	2	-20.62 to 24.62	No	ns	0.976
Sh-Ctrl vs. Sh-NFATc2-B	2	-20.62 to 24.62	No	ns	0.976
Sh-NFATc2-A vs. Sh-NFATc2-B	0	-22.62 to 22.62	No	ns	>0.9999
21
Sh-Ctrl vs. Sh-NFATc2-A	6.6	-16.02 to 29.22	No	ns	0.7683
Sh-Ctrl vs. Sh-NFATc2-B	3.51	-19.11 to 26.13	No	ns	0.928
Sh-NFATc2-A vs. Sh-NFATc2-B	-3.09	-25.71 to 19.53	No	ns	0.9438
24
Sh-Ctrl vs. Sh-NFATc2-A	10	-12.62 to 32.62	No	ns	0.5475
Sh-Ctrl vs. Sh-NFATc2-B	4.301	-18.32 to 26.92	No	ns	0.8939
Sh-NFATc2-A vs. Sh-NFATc2-B	-5.699	-28.32 to 16.92	No	ns	0.8215
31
Sh-Ctrl vs. Sh-NFATc2-A	15.22	-7.396 to 37.84	No	ns	0.2508
Sh-Ctrl vs. Sh-NFATc2-B	6.527	-16.09 to 29.15	No	ns	0.7728
Sh-NFATc2-A vs. Sh-NFATc2-B	-8.695	-31.31 to 13.92	No	ns	0.6336
35
Sh-Ctrl vs. Sh-NFATc2-A	54.69	32.07 to 77.31	Yes	****	<0.0001
Sh-Ctrl vs. Sh-NFATc2-B	42.57	19.95 to 65.19	Yes	****	<0.0001
Sh-NFATc2-A vs. Sh-NFATc2-B	-12.12	-34.73 to 10.5	No	ns	0.4142
38
Sh-Ctrl vs. Sh-NFATc2-A	77.77	55.15 to 100.4	Yes	****	<0.0001
Sh-Ctrl vs. Sh-NFATc2-B	63.87	41.25 to 86.49	Yes	****	<0.0001
Sh-NFATc2-A vs. Sh-NFATc2-B	-13.9	-36.52 to 8.72	No	ns	0.3147
42
Sh-Ctrl vs. Sh-NFATc2-A	114	91.42 to 136.7	Yes	****	<0.0001
Sh-Ctrl vs. Sh-NFATc2-B	102	79.34 to 124.6	Yes	****	<0.0001
Sh-NFATc2-A vs. Sh-NFATc2-B	-12.08	-34.7 to 10.54	No	ns	0.4163
49
Sh-Ctrl vs. Sh-NFATc2-A	147	124.4 to 169.6	Yes	****	<0.0001
Sh-Ctrl vs. Sh-NFATc2-B	138.4	115.8 to 161	Yes	****	<0.0001
Sh-NFATc2-A vs. Sh-NFATc2-B	-8.613	-31.23 to 14.01	No	ns	0.639
52
Sh-Ctrl vs. Sh-NFATc2-A	201.8	179.2 to 224.4	Yes	****	<0.0001
Sh-Ctrl vs. Sh-NFATc2-B	179.9	157.2 to 202.5	Yes	****	<0.0001
Sh-NFATc2-A vs. Sh-NFATc2-B	-21.94	-44.56 to 0.678	No	ns	0.0593
Test details	Mean 1	Mean 2	Mean Diff.	SE of diff.	N1	N2	q	DF
14
Sh-Ctrl vs. Sh-NFATc2-A	3	0	3	9.531	5	5	0.4451	120
Sh-Ctrl vs. Sh-NFATc2-B	3	0	3	9.531	5	5	0.4451	120
Sh-NFATc2-A vs. Sh-NFATc2-B	0	0	0	9.531	5	5	0	120
19
Sh-Ctrl vs. Sh-NFATc2-A	2	0	2	9.531	5	5	0.2968	120
Sh-Ctrl vs. Sh-NFATc2-B	2	0	2	9.531	5	5	0.2968	120
Sh-NFATc2-A vs. Sh-NFATc2-B	0	0	0	9.531	5	5	0	120
21
Sh-Ctrl vs. Sh-NFATc2-A	6.6	0	6.6	9.531	5	5	0.9793	120
Sh-Ctrl vs. Sh-NFATc2-B	6.6	3.09	3.51	9.531	5	5	0.5209	120
Sh-NFATc2-A vs. Sh-NFATc2-B	0	3.09	-3.09	9.531	5	5	0.4584	120
24
Sh-Ctrl vs. Sh-NFATc2-A	11	1	10	9.531	5	5	1.484	120
Sh-Ctrl vs. Sh-NFATc2-B	11	6.699	4.301	9.531	5	5	0.6382	120
Sh-NFATc2-A vs. Sh-NFATc2-B	1	6.699	-5.699	9.531	5	5	0.8456	120
31
Sh-Ctrl vs. Sh-NFATc2-A	19.71	4.486	15.22	9.531	5	5	2.259	120
Sh-Ctrl vs. Sh-NFATc2-B	19.71	13.18	6.527	9.531	5	5	0.9685	120
Sh-NFATc2-A vs. Sh-NFATc2-B	4.486	13.18	-8.695	9.531	5	5	1.29	120
35
Sh-Ctrl vs. Sh-NFATc2-A	65.8	11.11	54.69	9.531	5	5	8.114	120
Sh-Ctrl vs. Sh-NFATc2-B	65.8	23.23	42.57	9.531	5	5	6.317	120
Sh-NFATc2-A vs. Sh-NFATc2-B	11.11	23.23	-12.12	9.531	5	5	1.798	120
38
Sh-Ctrl vs. Sh-NFATc2-A	95.6	17.83	77.77	9.531	5	5	11.54	120
Sh-Ctrl vs. Sh-NFATc2-B	95.6	31.73	63.87	9.531	5	5	9.477	120
Sh-NFATc2-A vs. Sh-NFATc2-B	17.83	31.73	-13.9	9.531	5	5	2.062	120
42
Sh-Ctrl vs. Sh-NFATc2-A	140.9	26.86	114	9.531	5	5	16.92	120
Sh-Ctrl vs. Sh-NFATc2-B	140.9	38.94	102	9.531	5	5	15.13	120
Sh-NFATc2-A vs. Sh-NFATc2-B	26.86	38.94	-12.08	9.531	5	5	1.792	120
49
Sh-Ctrl vs. Sh-NFATc2-A	181.9	34.89	147	9.531	5	5	21.81	120
Sh-Ctrl vs. Sh-NFATc2-B	181.9	43.5	138.4	9.531	5	5	20.53	120
Sh-NFATc2-A vs. Sh-NFATc2-B	34.89	43.5	-8.613	9.531	5	5	1.278	120
52
Sh-Ctrl vs. Sh-NFATc2-A	245.2	43.37	201.8	9.531	5	5	29.94	120
Sh-Ctrl vs. Sh-NFATc2-B	245.2	65.31	179.9	9.531	5	5	26.69	120
Sh-NFATc2-A vs. Sh-NFATc2-B	43.37	65.31	-21.94	9.531	5	5	3.256	120

## Sheet: Figure 3D
Days	Tumor volume
	RFP					RFP-NFATc2
14	0	0	0	0	0	13.5	13.5	13.5	0	0
18	0	0	0	0	0	13.5	22.7301	13.5	0	0
21	0	0	0	0	0	38.5159	35.6423	31.1364	13.5	0
25	3	0	0	0	4	62.291	57.8062	49.5982	23.5886	20.4703
28	4	4	0	4	4	63.3463	65.3072	59.3757	18.8122	36.7327
35	4	4	0	4	4	81.0554	91.7219	79.3016	36.6953	46.3909
38	4	13.5	4	13.5	4	135.992	93.5238	102.469	51.0714	65.4896
42	13.5	13.5	4	13.5	13.5	186.587	120.297	138.125	50.7371	85.1685
45	13.5	13.5	13.5	13.5	33.045	234.644	171.988	171.225	72.03	110.857
49	41.198	48.2368	13.5	18.9929	52.6965	292.285	250.59	224.709	148.896	122.062
52	46.3895	62.8748	26.6779	27.9283	126.949	335.919	295.58	276.196	197.352	190.834
56	60.3956	83.4578	31.5526	39.641	143.169	373.513	372.985	318.663	237.102	254.722
59	84.0305	86.8014	36.6647	60.0935	142.313	416.826	452.251	458.775	410.043	301.908
63	86.3745	153.042	53.6996	102.263	170.134	521.228	539.163	553.225	496.446	387.974
Calculated by GraphPad Prism7.0
Table Analyzed	Figire 2I
Two-way RM ANOVA	Matching: Stacked
Alpha	0.05
Source of Variation	% of total variation	P value	P value summary	Significant?
Interaction	19.07	<0.0001	****	Yes
Time	49.77	<0.0001	****	Yes
Column Factor	24.78	<0.0001	****	Yes
Subjects (matching)	3.601	<0.0001	****	Yes
ANOVA table	SS	DF	MS	F (DFn, DFd)	P value
Interaction	465023	13	35771	F (13, 104) = 54.82	P<0.0001
Time	1213898	13	93377	F (13, 104) = 143.1	P<0.0001
Column Factor	604420	1	604420	F (1, 8) = 55.05	P<0.0001
Subjects (matching)	87830	8	10979	F (8, 104) = 16.83	P<0.0001
Residual	67860	104	652.5
Number of missing values	0
Compare each cell mean with the other cell mean in that row
Number of families	1
Number of comparisons per family	14
Alpha	0.05
Sidak's multiple comparisons test	Mean Diff.	95.00% CI of diff.	Significant?	Summary	Adjusted P Value
RFP - RFP-NFATc2
14	-8.1	-78.11 to 61.91	No	ns	>0.9999
18	-9.946	-79.95 to 60.06	No	ns	>0.9999
21	-23.76	-93.76 to 46.25	No	ns	0.9951
25	-41.35	-111.4 to 28.66	No	ns	0.6992
28	-45.51	-115.5 to 24.49	No	ns	0.5545
35	-63.83	-133.8 to 6.173	No	ns	0.1045
38	-81.91	-151.9 to -11.9	Yes	*	0.0102
42	-104.6	-174.6 to -34.58	Yes	***	0.0003
45	-134.7	-204.7 to -64.73	Yes	****	<0.0001
49	-172.8	-242.8 to -102.8	Yes	****	<0.0001
52	-201	-271 to -131	Yes	****	<0.0001
56	-239.8	-309.8 to -169.7	Yes	****	<0.0001
59	-326	-396 to -256	Yes	****	<0.0001
63	-386.5	-456.5 to -316.5	Yes	****	<0.0001
Test details	Mean 1	Mean 2	Mean Diff.	SE of diff.	N1	N2	t	DF
RFP - RFP-NFATc2
14	0	8.1	-8.1	23.58	5	5	0.3435	112
18	0	9.946	-9.946	23.58	5	5	0.4218	112
21	0	23.76	-23.76	23.58	5	5	1.008	112
25	1.4	42.75	-41.35	23.58	5	5	1.754	112
28	3.2	48.71	-45.51	23.58	5	5	1.93	112
35	3.2	67.03	-63.83	23.58	5	5	2.707	112
38	7.8	89.71	-81.91	23.58	5	5	3.474	112
42	11.6	116.2	-104.6	23.58	5	5	4.435	112
45	17.41	152.1	-134.7	23.58	5	5	5.714	112
49	34.92	207.7	-172.8	23.58	5	5	7.327	112
52	58.16	259.2	-201	23.58	5	5	8.525	112
56	71.64	311.4	-239.8	23.58	5	5	10.17	112
59	81.98	408	-326	23.58	5	5	13.82	112
63	113.1	499.6	-386.5	23.58	5	5	16.39	112
52
Sh-Ctrl vs. Sh-NFATc2-A	161	92.98 to 228.9	Yes	****		<0.0001
Sh-Ctrl vs. Sh-NFATc2-B	190.9	122.9 to 258.9	Yes	****		<0.0001
Sh-NFATc2-A vs. Sh-NFATc2-B	29.96	-38.01 to 97.93	No	ns		0.5487
56
Sh-Ctrl vs. Sh-NFATc2-A	238.3	170.3 to 306.3	Yes	****		<0.0001
Sh-Ctrl vs. Sh-NFATc2-B	280.8	212.8 to 348.7	Yes	****		<0.0001
Sh-NFATc2-A vs. Sh-NFATc2-B	42.44	-25.53 to 110.4	No	ns		0.3026
63
Sh-Ctrl vs. Sh-NFATc2-A	258.9	190.9 to 326.8	Yes	****		<0.0001
Sh-Ctrl vs. Sh-NFATc2-B	318.7	250.7 to 386.6	Yes	****		<0.0001
Sh-NFATc2-A vs. Sh-NFATc2-B	59.81	-8.159 to 127.8	No	ns		0.0964
Test details	Mean 1	Mean 2	Mean Diff.	SE of diff.		N1	N2	q	DF
14
Sh-Ctrl vs. Sh-NFATc2-A	3.75	0	3.75	28.6		4	4	0.1854	108
Sh-Ctrl vs. Sh-NFATc2-B	3.75	0	3.75	28.6		4	4	0.1854	108
Sh-NFATc2-A vs. Sh-NFATc2-B	0	0	0	28.6		4	4	0	108
19
Sh-Ctrl vs. Sh-NFATc2-A	8.25	0	8.25	28.6		4	4	0.4079	108
Sh-Ctrl vs. Sh-NFATc2-B	8.25	0	8.25	28.6		4	4	0.4079	108
Sh-NFATc2-A vs. Sh-NFATc2-B	0	0	0	28.6		4	4	0	108
21
Sh-Ctrl vs. Sh-NFATc2-A	15	1.25	13.75	28.6		4	4	0.6799	108
Sh-Ctrl vs. Sh-NFATc2-B	15	0	15	28.6		4	4	0.7417	108
Sh-NFATc2-A vs. Sh-NFATc2-B	1.25	0	1.25	28.6		4	4	0.06181	108
24
Sh-Ctrl vs. Sh-NFATc2-A	29.44	11.25	18.19	28.6		4	4	0.8994	108
Sh-Ctrl vs. Sh-NFATc2-B	29.44	0	29.44	28.6		4	4	1.456	108
Sh-NFATc2-A vs. Sh-NFATc2-B	11.25	0	11.25	28.6		4	4	0.5563	108
31
Sh-Ctrl vs. Sh-NFATc2-A	59.36	24.56	34.8	28.6		4	4	1.721	108
Sh-Ctrl vs. Sh-NFATc2-B	59.36	0	59.36	28.6		4	4	2.935	108
Sh-NFATc2-A vs. Sh-NFATc2-B	24.56	0	24.56	28.6		4	4	1.214	108
35
Sh-Ctrl vs. Sh-NFATc2-A	74.07	27.78	46.28	28.6		4	4	2.289	108
Sh-Ctrl vs. Sh-NFATc2-B	74.07	1.25	72.82	28.6		4	4	3.601	108
Sh-NFATc2-A vs. Sh-NFATc2-B	27.78	1.25	26.53	28.6		4	4	1.312	108
38
Sh-Ctrl vs. Sh-NFATc2-A	92.63	28.17	64.47	28.6		4	4	3.188	108
Sh-Ctrl vs. Sh-NFATc2-B	92.63	2.5	90.13	28.6		4	4	4.457	108
Sh-NFATc2-A vs. Sh-NFATc2-B	28.17	2.5	25.67	28.6		4	4	1.269	108
42
Sh-Ctrl vs. Sh-NFATc2-A	134	35.63	98.39	28.6		4	4	4.865	108
Sh-Ctrl vs. Sh-NFATc2-B	134	3.75	130.3	28.6		4	4	6.441	108
Sh-NFATc2-A vs. Sh-NFATc2-B	35.63	3.75	31.88	28.6		4	4	1.576	108
49
Sh-Ctrl vs. Sh-NFATc2-A	185.1	40.33	144.8	28.6		4	4	7.161	108
Sh-Ctrl vs. Sh-NFATc2-B	185.1	13.86	171.3	28.6		4	4	8.469	108
Sh-NFATc2-A vs. Sh-NFATc2-B	40.33	13.86	26.47	28.6		4	4	1.309	108
52
Sh-Ctrl vs. Sh-NFATc2-A	222.7	61.8	161	28.6		4	4	7.958	108
Sh-Ctrl vs. Sh-NFATc2-B	222.7	31.84	190.9	28.6		4	4	9.44	108
Sh-NFATc2-A vs. Sh-NFATc2-B	61.8	31.84	29.96	28.6		4	4	1.481	108
56
Sh-Ctrl vs. Sh-NFATc2-A	320.6	82.33	238.3	28.6		4	4	11.78	108
Sh-Ctrl vs. Sh-NFATc2-B	320.6	39.89	280.8	28.6		4	4	13.88	108
Sh-NFATc2-A vs. Sh-NFATc2-B	82.33	39.89	42.44	28.6		4	4	2.099	108
63
Sh-Ctrl vs. Sh-NFATc2-A	374.6	115.7	258.9	28.6		4	4	12.8	108
Sh-Ctrl vs. Sh-NFATc2-B	374.6	55.89	318.7	28.6		4	4	15.76	108
Sh-NFATc2-A vs. Sh-NFATc2-B	115.7	55.89	59.81	28.6		4	4	2.957	108
