# Supplementary material for: NFATc2 enhances tumor-initiating phenotypes through the NFATc2/SOX2/ALDH axis in lung adenocarcinoma
Source: eLife. 2017 Jul 24;6:e26733. doi: 10.7554/eLife.26733 (PMC5570574; doi:10.7554/eLife.26733)
Supplement: Figure 4—source data 1. — DOI: http://dx.doi.org/10.7554/eLife.26733.013 [file elife-26733-fig4-data1.xlsx]

## Sheet: Figure 4D
	Sh-Ctrl Vehicle					Sh-NFATc2-A Vehicle					Sh-NFATc2-B Vehicle
Tumor volume	280.464	446.427	346.068	193.266	303.183	85.3403	98.1215	57.912	78.4328	126.361	66.7095	78.417	90.4664	94.9413	32.8536
	Sh-Ctrl Cisplatin 4mg/kg					Sh-NFATc2-A Cisplatin 4mg/kg					Sh-NFATc2-B Cisplatin 4mg/kg
Tumor volume	151.814	232.94	170.971	169.164	270.908	39.9539	32.6312	20.8905	20.0593	22.6394	32.565	20.2272	19.5548	31.1132	34.2916
Calculated by GraphPad Prism7.0
Table Analyzed	Figure 4D
Column D	Sh-Ctrl Cisplatin 4mg/kg		Column E	Sh-NFATc2-A Cisplatin 4mg/kg		Column F	Sh-NFATc2-B Cisplatin 4mg/kg
vs.	vs.		vs.	vs.		vs.	vs.
Column A	Sh-Ctrl Vehicle		Column B	Sh-NFATc2-A Vehicle		Column C	Sh-NFATc2-B Vehicle
Unpaired t test			Unpaired t test			Unpaired t test with Welch's correction
P value	0.0195		P value	0.0008		P value	0.007
P value summary	*		P value summary	***		P value summary	**
Significantly different (P < 0.05)?	Yes		Significantly different (P < 0.05)?	Yes		Significantly different (P < 0.05)?	Yes
One- or two-tailed P value?	Two-tailed		One- or two-tailed P value?	Two-tailed		One- or two-tailed P value?	Two-tailed
t, df	t=2.838 df=9		t, df	t=4.951 df=9		Welch-corrected t, df	t=4.09 df=5.773
How big is the difference?			How big is the difference?			How big is the difference?
Mean ± SEM of column A	313.9 ± 41.46, n=5		Mean ± SEM of column B	89.23 ± 11.34, n=5		Mean ± SEM of column C	69.34 ± 9.663, n=6
Mean ± SEM of column D	187.1 ± 22.05, n=6		Mean ± SEM of column E	31.27 ± 5.141, n=6		Mean ± SEM of column F	28.3 ± 2.695, n=6
Difference between means	-126.8 ± 44.67		Difference between means	-57.96 ± 11.71		Difference between means	-41.03 ± 10.03
95% confidence interval	-227.8 to -25.74		95% confidence interval	-84.44 to -31.48		95% confidence interval	-65.82 to -16.25
R squared (eta squared)	0.4723		R squared (eta squared)	0.7315		R squared (eta squared)	0.7435
F test to compare variances			F test to compare variances			F test to compare variances
F, DFn, Dfd	2.945, 4, 5		F, DFn, Dfd	4.051, 4, 5		F, DFn, Dfd	12.85, 5, 5
P value	0.267		P value	0.1571		P value	0.014
P value summary	ns		P value summary	ns		P value summary	*
Significantly different (P < 0.05)?	No		Significantly different (P < 0.05)?	No		Significantly different (P < 0.05)?	Yes
Table Analyzed	Figure 4D
Column E	Sh-NFATc2-A Cisplatin 4mg/kg		Column F	Sh-NFATc2-B Cisplatin 4mg/kg
vs.	vs.		vs.	vs.
Column D	Sh-Ctrl Cisplatin 4mg/kg		Column D	Sh-Ctrl Cisplatin 4mg/kg
Unpaired t test with Welch's correction			Unpaired t test with Welch's correction
P value	0.0007		P value	0.0007
P value summary	***		P value summary	***
Significantly different (P < 0.05)?	Yes		Significantly different (P < 0.05)?	Yes
One- or two-tailed P value?	Two-tailed		One- or two-tailed P value?	Two-tailed
Welch-corrected t, df	t=6.881 df=5.542		Welch-corrected t, df	t=7.147 df=5.149
How big is the difference?			How big is the difference?
Mean ± SEM of column D	187.1 ± 22.05, n=6		Mean ± SEM of column D	187.1 ± 22.05, n=6
Mean ± SEM of column E	31.27 ± 5.141, n=6		Mean ± SEM of column F	28.3 ± 2.695, n=6
Difference between means	-155.8 ± 22.65		Difference between means	-158.8 ± 22.22
95% confidence interval	-212.4 to -99.28		95% confidence interval	-215.4 to -102.2
R squared (eta squared)	0.8952		R squared (eta squared)	0.9084
F test to compare variances			F test to compare variances
F, DFn, Dfd	18.4, 5, 5		F, DFn, Dfd	66.96, 5, 5
P value	0.0062		P value	0.0003
P value summary	**		P value summary	***
Significantly different (P < 0.05)?	Yes		Significantly different (P < 0.05)?	Yes

## Sheet: Figure4-figure supplement 1B
Days	Tumor volume
	Sh-Ctrl Vehicle					Sh-NFATc2-A Vehicle					Sh-NFATc2-B Vehicle
9	47.5887	59.6362	64.4112	36.495	42.1355	10.3427	0	0	0	15.4031	27.7498	18.3521	0	22.9408	20.3213
13	93.3675	90.0168	104.044	71.582	73.4003	19.9826	0	35.549	20.7221	44.0062	56.6636	43.0037	39.3129	22.4799	25.6499
16	156.651	172.25	134.946	70.182	65.2587	56.6819	4	44.3583	37.9396	35.3913	59.0664	39.8002	52.6807	33.3234	36.5167
20	228.077	217.588	166.381	137.496	176.979	52.23	4	36.7775	43.2162	37.4626	49.5825	69.489	38.4123	42.9541	30.3958
23	206.217	332.975	226.182	173.889	209.164	67.356	82.9719	36.5121	68.625	106.566	50.4272	61.8688	74.8534	70.4306	31.1069
27	280.464	446.427	346.068	193.266	303.183	85.3403	98.1215	57.912	78.4328	126.361	66.7095	78.417	90.4664	94.9413	32.8536
Days	Tumor volume
	Sh-Ctrl Cisplatin 4mg/kg					Sh-NFATc2-A Cisplatin 4mg/kg					Sh-NFATc2-B Cisplatin 4mg/kg
9	52.7906	38.447	59.7322	42.6776	43.3581	14.6963	0.5	21.535	0	9.68256	28.6888	24.419	21.956	0	10.5508
13	76.7242	58.8931	52.8541	67.2387	90.3666	10.7665	13.589	21.8066	0.5	8.15863	24.4857	36.2639	11.8757	0	18.2139
16	61.3751	101.314	127.619	107.496	128.516	22.4052	17.4636	19.9799	19.6424	19.3721	24.624	14.7353	39.6624	34.1059	23.625
20	146.685	124.617	84.035	129.492	154.919	21.1956	9.96034	19.5675	10.3875	18.7046	30.5772	19.8736	36.5936	26.4452	42.1063
23	147.053	143.484	188.459	172.936	176.861	29.124	25.8572	15.1576	21.8795	20.777	28.2852	19.4763	18.1147	29.1384	36.2984
27	151.814	232.94	170.971	169.164	270.908	39.9539	32.6312	20.8905	20.0593	22.6394	32.565	20.2272	19.5548	31.1132	34.2916
Calculated by GraphPad Prism7.0
Table Analyzed	Figure4-figure supplement 1B
Two-way RM ANOVA	Matching: Stacked
Alpha	0.05
Source of Variation	% of total variation	P value	P value summary	Significant?
Interaction	17.01	<0.0001	****	Yes
Time	19.45	<0.0001	****	Yes
Column Factor	52.98	<0.0001	****	Yes
Subjects (matching)	4.863	<0.0001	****	Yes
ANOVA table	SS	DF	MS	F (DFn, DFd)	P value
Interaction	167231	25	6689	F (25, 120) = 14.3	P<0.0001
Time	191208	5	38242	F (5, 120) = 81.74	P<0.0001
Column Factor	520919	5	104184	F (5, 24) = 52.29	P<0.0001
Subjects (matching)	47815	24	1992	F (24, 120) = 4.259	P<0.0001
Residual	56138	120	467.8
Number of missing values	0
Within each row, compare columns (simple effects within rows)
Within each row, compare columns (simple effects within rows)
Number of families	6
Number of comparisons per family	15
Alpha	0.05
Tukey's multiple comparisons test	Mean Diff.	95.00% CI of diff.	Significant?	Summary	Adjusted P Value
9
Sh-Ctrl Vehicle vs. Sh-NFATc2-A Vehicle	44.9	-4.179 to 93.99	No	ns	0.0938
Sh-Ctrl Vehicle vs. Sh-NFATc2-B Vehicle	32.18	-16.9 to 81.26	No	ns	0.4102
Sh-Ctrl Vehicle vs. Sh-Ctrl Cisplatin 4mg/kg	2.652	-46.43 to 51.74	No	ns	>0.9999
Sh-Ctrl Vehicle vs. Sh-NFATc2-A Cisplatin 4mg/kg	40.77	-8.313 to 89.85	No	ns	0.1634
Sh-Ctrl Vehicle vs. Sh-NFATc2-B Cisplatin 4mg/kg	32.93	-16.15 to 82.01	No	ns	0.3836
Sh-NFATc2-A Vehicle vs. Sh-NFATc2-B Vehicle	-12.72	-61.81 to 36.36	No	ns	0.9753
Sh-NFATc2-A Vehicle vs. Sh-Ctrl Cisplatin 4mg/kg	-42.25	-91.34 to 6.831	No	ns	0.135
Sh-NFATc2-A Vehicle vs. Sh-NFATc2-A Cisplatin 4mg/kg	-4.134	-53.22 to 44.95	No	ns	0.9999
Sh-NFATc2-A Vehicle vs. Sh-NFATc2-B Cisplatin 4mg/kg	-11.97	-61.06 to 37.11	No	ns	0.9811
Sh-NFATc2-B Vehicle vs. Sh-Ctrl Cisplatin 4mg/kg	-29.53	-78.61 to 19.56	No	ns	0.5094
Sh-NFATc2-B Vehicle vs. Sh-NFATc2-A Cisplatin 4mg/kg	8.59	-40.49 to 57.67	No	ns	0.9959
Sh-NFATc2-B Vehicle vs. Sh-NFATc2-B Cisplatin 4mg/kg	0.7499	-48.33 to 49.83	No	ns	>0.9999
Sh-Ctrl Cisplatin 4mg/kg vs. Sh-NFATc2-A Cisplatin 4mg/kg	38.12	-10.97 to 87.2	No	ns	0.2248
Sh-Ctrl Cisplatin 4mg/kg vs. Sh-NFATc2-B Cisplatin 4mg/kg	30.28	-18.81 to 79.36	No	ns	0.4807
Sh-NFATc2-A Cisplatin 4mg/kg vs. Sh-NFATc2-B Cisplatin 4mg/kg	-7.84	-56.92 to 41.24	No	ns	0.9973
13
Sh-Ctrl Vehicle vs. Sh-NFATc2-A Vehicle	62.43	13.35 to 111.5	Yes	**	0.0045
Sh-Ctrl Vehicle vs. Sh-NFATc2-B Vehicle	49.06	-0.02337 to 98.14	No	ns	0.0502
Sh-Ctrl Vehicle vs. Sh-Ctrl Cisplatin 4mg/kg	17.27	-31.82 to 66.35	No	ns	0.9119
Sh-Ctrl Vehicle vs. Sh-NFATc2-A Cisplatin 4mg/kg	75.52	26.43 to 124.6	Yes	***	0.0002
Sh-Ctrl Vehicle vs. Sh-NFATc2-B Cisplatin 4mg/kg	68.31	19.23 to 117.4	Yes	**	0.0013
Sh-NFATc2-A Vehicle vs. Sh-NFATc2-B Vehicle	-13.37	-62.45 to 35.71	No	ns	0.9694
Sh-NFATc2-A Vehicle vs. Sh-Ctrl Cisplatin 4mg/kg	-45.16	-94.25 to 3.92	No	ns	0.0904
Sh-NFATc2-A Vehicle vs. Sh-NFATc2-A Cisplatin 4mg/kg	13.09	-36 to 62.17	No	ns	0.9721
Sh-NFATc2-A Vehicle vs. Sh-NFATc2-B Cisplatin 4mg/kg	5.884	-43.2 to 54.97	No	ns	0.9993
Sh-NFATc2-B Vehicle vs. Sh-Ctrl Cisplatin 4mg/kg	-31.79	-80.88 to 17.29	No	ns	0.4242
Sh-NFATc2-B Vehicle vs. Sh-NFATc2-A Cisplatin 4mg/kg	26.46	-22.63 to 75.54	No	ns	0.628
Sh-NFATc2-B Vehicle vs. Sh-NFATc2-B Cisplatin 4mg/kg	19.25	-29.83 to 68.34	No	ns	0.8668
Sh-Ctrl Cisplatin 4mg/kg vs. Sh-NFATc2-A Cisplatin 4mg/kg	58.25	9.168 to 107.3	Yes	*	0.0101
Sh-Ctrl Cisplatin 4mg/kg vs. Sh-NFATc2-B Cisplatin 4mg/kg	51.05	1.964 to 100.1	Yes	*	0.0364
Sh-NFATc2-A Cisplatin 4mg/kg vs. Sh-NFATc2-B Cisplatin 4mg/kg	-7.204	-56.29 to 41.88	No	ns	0.9982
16
Sh-Ctrl Vehicle vs. Sh-NFATc2-A Vehicle	84.18	35.1 to 133.3	Yes	****	<0.0001
Sh-Ctrl Vehicle vs. Sh-NFATc2-B Vehicle	75.58	26.5 to 124.7	Yes	***	0.0002
Sh-Ctrl Vehicle vs. Sh-Ctrl Cisplatin 4mg/kg	14.59	-34.49 to 63.68	No	ns	0.9555
Sh-Ctrl Vehicle vs. Sh-NFATc2-A Cisplatin 4mg/kg	100.1	51 to 149.2	Yes	****	<0.0001
Sh-Ctrl Vehicle vs. Sh-NFATc2-B Cisplatin 4mg/kg	92.51	43.42 to 141.6	Yes	****	<0.0001
Sh-NFATc2-A Vehicle vs. Sh-NFATc2-B Vehicle	-8.603	-57.69 to 40.48	No	ns	0.9959
Sh-NFATc2-A Vehicle vs. Sh-Ctrl Cisplatin 4mg/kg	-69.59	-118.7 to -20.51	Yes	***	0.001
Sh-NFATc2-A Vehicle vs. Sh-NFATc2-A Cisplatin 4mg/kg	15.9	-33.18 to 64.98	No	ns	0.9366
Sh-NFATc2-A Vehicle vs. Sh-NFATc2-B Cisplatin 4mg/kg	8.324	-40.76 to 57.41	No	ns	0.9965
Sh-NFATc2-B Vehicle vs. Sh-Ctrl Cisplatin 4mg/kg	-60.99	-110.1 to -11.9	Yes	**	0.006
Sh-NFATc2-B Vehicle vs. Sh-NFATc2-A Cisplatin 4mg/kg	24.5	-24.58 to 73.59	No	ns	0.7013
Sh-NFATc2-B Vehicle vs. Sh-NFATc2-B Cisplatin 4mg/kg	16.93	-32.16 to 66.01	No	ns	0.9185
Sh-Ctrl Cisplatin 4mg/kg vs. Sh-NFATc2-A Cisplatin 4mg/kg	85.49	36.41 to 134.6	Yes	****	<0.0001
Sh-Ctrl Cisplatin 4mg/kg vs. Sh-NFATc2-B Cisplatin 4mg/kg	77.91	28.83 to 127	Yes	***	0.0001
Sh-NFATc2-A Cisplatin 4mg/kg vs. Sh-NFATc2-B Cisplatin 4mg/kg	-7.578	-56.66 to 41.51	No	ns	0.9977
20
Sh-Ctrl Vehicle vs. Sh-NFATc2-A Vehicle	150.6	101.5 to 199.7	Yes	****	<0.0001
Sh-Ctrl Vehicle vs. Sh-NFATc2-B Vehicle	139.1	90.05 to 188.2	Yes	****	<0.0001
Sh-Ctrl Vehicle vs. Sh-Ctrl Cisplatin 4mg/kg	57.35	8.271 to 106.4	Yes	*	0.012
Sh-Ctrl Vehicle vs. Sh-NFATc2-A Cisplatin 4mg/kg	169.3	120.3 to 218.4	Yes	****	<0.0001
Sh-Ctrl Vehicle vs. Sh-NFATc2-B Cisplatin 4mg/kg	154.2	105.1 to 203.3	Yes	****	<0.0001
Sh-NFATc2-A Vehicle vs. Sh-NFATc2-B Vehicle	-11.43	-60.51 to 37.65	No	ns	0.9847
Sh-NFATc2-A Vehicle vs. Sh-Ctrl Cisplatin 4mg/kg	-93.21	-142.3 to -44.13	Yes	****	<0.0001
Sh-NFATc2-A Vehicle vs. Sh-NFATc2-A Cisplatin 4mg/kg	18.77	-30.31 to 67.86	No	ns	0.8787
Sh-NFATc2-A Vehicle vs. Sh-NFATc2-B Cisplatin 4mg/kg	3.618	-45.47 to 52.7	No	ns	>0.9999
Sh-NFATc2-B Vehicle vs. Sh-Ctrl Cisplatin 4mg/kg	-81.78	-130.9 to -32.7	Yes	****	<0.0001
Sh-NFATc2-B Vehicle vs. Sh-NFATc2-A Cisplatin 4mg/kg	30.2	-18.88 to 79.29	No	ns	0.4835
Sh-NFATc2-B Vehicle vs. Sh-NFATc2-B Cisplatin 4mg/kg	15.05	-34.04 to 64.13	No	ns	0.9494
Sh-Ctrl Cisplatin 4mg/kg vs. Sh-NFATc2-A Cisplatin 4mg/kg	112	62.9 to 161.1	Yes	****	<0.0001
Sh-Ctrl Cisplatin 4mg/kg vs. Sh-NFATc2-B Cisplatin 4mg/kg	96.83	47.75 to 145.9	Yes	****	<0.0001
Sh-NFATc2-A Cisplatin 4mg/kg vs. Sh-NFATc2-B Cisplatin 4mg/kg	-15.16	-64.24 to 33.93	No	ns	0.9479
23
Sh-Ctrl Vehicle vs. Sh-NFATc2-A Vehicle	157.3	108.2 to 206.4	Yes	****	<0.0001
Sh-Ctrl Vehicle vs. Sh-NFATc2-B Vehicle	171.9	122.9 to 221	Yes	****	<0.0001
Sh-Ctrl Vehicle vs. Sh-Ctrl Cisplatin 4mg/kg	63.93	14.84 to 113	Yes	**	0.0033
Sh-Ctrl Vehicle vs. Sh-NFATc2-A Cisplatin 4mg/kg	207.1	158 to 256.2	Yes	****	<0.0001
Sh-Ctrl Vehicle vs. Sh-NFATc2-B Cisplatin 4mg/kg	203.4	154.3 to 252.5	Yes	****	<0.0001
Sh-NFATc2-A Vehicle vs. Sh-NFATc2-B Vehicle	14.67	-34.41 to 63.75	No	ns	0.9545
Sh-NFATc2-A Vehicle vs. Sh-Ctrl Cisplatin 4mg/kg	-93.35	-142.4 to -44.27	Yes	****	<0.0001
Sh-NFATc2-A Vehicle vs. Sh-NFATc2-A Cisplatin 4mg/kg	49.85	0.7638 to 98.93	Yes	*	0.0443
Sh-NFATc2-A Vehicle vs. Sh-NFATc2-B Cisplatin 4mg/kg	46.14	-2.94 to 95.23	No	ns	0.0784
Sh-NFATc2-B Vehicle vs. Sh-Ctrl Cisplatin 4mg/kg	-108	-157.1 to -58.94	Yes	****	<0.0001
Sh-NFATc2-B Vehicle vs. Sh-NFATc2-A Cisplatin 4mg/kg	35.18	-13.91 to 84.26	No	ns	0.3088
Sh-NFATc2-B Vehicle vs. Sh-NFATc2-B Cisplatin 4mg/kg	31.47	-17.61 to 80.56	No	ns	0.4359
Sh-Ctrl Cisplatin 4mg/kg vs. Sh-NFATc2-A Cisplatin 4mg/kg	143.2	94.12 to 192.3	Yes	****	<0.0001
Sh-Ctrl Cisplatin 4mg/kg vs. Sh-NFATc2-B Cisplatin 4mg/kg	139.5	90.41 to 188.6	Yes	****	<0.0001
Sh-NFATc2-A Cisplatin 4mg/kg vs. Sh-NFATc2-B Cisplatin 4mg/kg	-3.704	-52.79 to 45.38	No	ns	>0.9999
27
Sh-Ctrl Vehicle vs. Sh-NFATc2-A Vehicle	224.6	175.6 to 273.7	Yes	****	<0.0001
Sh-Ctrl Vehicle vs. Sh-NFATc2-B Vehicle	241.2	192.1 to 290.3	Yes	****	<0.0001
Sh-Ctrl Vehicle vs. Sh-Ctrl Cisplatin 4mg/kg	114.7	65.64 to 163.8	Yes	****	<0.0001
Sh-Ctrl Vehicle vs. Sh-NFATc2-A Cisplatin 4mg/kg	286.6	237.6 to 335.7	Yes	****	<0.0001
Sh-Ctrl Vehicle vs. Sh-NFATc2-B Cisplatin 4mg/kg	286.3	237.2 to 335.4	Yes	****	<0.0001
Sh-NFATc2-A Vehicle vs. Sh-NFATc2-B Vehicle	16.56	-32.53 to 65.64	No	ns	0.9254
Sh-NFATc2-A Vehicle vs. Sh-Ctrl Cisplatin 4mg/kg	-109.9	-159 to -60.84	Yes	****	<0.0001
Sh-NFATc2-A Vehicle vs. Sh-NFATc2-A Cisplatin 4mg/kg	62	12.92 to 111.1	Yes	**	0.0049
Sh-NFATc2-A Vehicle vs. Sh-NFATc2-B Cisplatin 4mg/kg	61.68	12.6 to 110.8	Yes	**	0.0052
Sh-NFATc2-B Vehicle vs. Sh-Ctrl Cisplatin 4mg/kg	-126.5	-175.6 to -77.4	Yes	****	<0.0001
Sh-NFATc2-B Vehicle vs. Sh-NFATc2-A Cisplatin 4mg/kg	45.44	-3.641 to 94.53	No	ns	0.0868
Sh-NFATc2-B Vehicle vs. Sh-NFATc2-B Cisplatin 4mg/kg	45.13	-3.956 to 94.21	No	ns	0.0909
Sh-Ctrl Cisplatin 4mg/kg vs. Sh-NFATc2-A Cisplatin 4mg/kg	171.9	122.8 to 221	Yes	****	<0.0001
Sh-Ctrl Cisplatin 4mg/kg vs. Sh-NFATc2-B Cisplatin 4mg/kg	171.6	122.5 to 220.7	Yes	****	<0.0001
Sh-NFATc2-A Cisplatin 4mg/kg vs. Sh-NFATc2-B Cisplatin 4mg/kg	-0.3155	-49.4 to 48.77	No	ns	>0.9999
Sh-NFATc2-B Vehicle vs. Sh-Ctrl Cisplatin 4mg/kg	-117.8	-162 to -73.5	Yes	****	<0.0001
Sh-NFATc2-B Vehicle vs. Sh-NFATc2-A Cisplatin 4mg/kg	38.06	-6.19 to 82.32	No	ns	0.1361
Sh-NFATc2-B Vehicle vs. Sh-NFATc2-B Cisplatin 4mg/kg	41.03	-3.221 to 85.29	No	ns	0.0862
Sh-Ctrl Cisplatin 4mg/kg vs. Sh-NFATc2-A Cisplatin 4mg/kg	155.8	111.6 to 200.1	Yes	****	<0.0001
Sh-Ctrl Cisplatin 4mg/kg vs. Sh-NFATc2-B Cisplatin 4mg/kg	158.8	114.5 to 203	Yes	****	<0.0001
Sh-NFATc2-A Cisplatin 4mg/kg vs. Sh-NFATc2-B Cisplatin 4mg/kg	2.969	-41.29 to 47.22	No	ns	>0.9999

## Sheet: Figure 4J
	Sh-Ctrl Vehicle						Sh-NFATc2-A Vehicle						Sh-NFATc2-B Vehicle
Tumor volume	153.702	131.477	116.731	71.434	124.78	83.4423	50.3788	39.9012	40.4959	51.2072	52.3414	40.393	61.1444	52.4637	56.8515	47.7897	47.6331	41.7894
	Sh-Ctrl Gefitinib 25mg/kg						Sh-NFATc2-A Gefitinib 25mg/kg						Sh-NFATc2-B Gefitinib 25mg/kg
Tumor volume	52.3346	44.2202	19.5448	30.903	17.531	37.1112	0	0	25.3472	20.3481	14.2939	16.9172	0	26.2777	0		11.1307	16.7442
Calculated by GraphPad Prism7.0
Table Analyzed	Figure 4J
Column D	Sh-Ctrl Gefitinib 25mg/kg		Column E	Sh-NFATc2-A Gefitinib 25mg/kg		Column F	Sh-NFATc2-B Gefitinib 25mg/kg
vs.	vs.		vs.	vs.		vs.	vs.
Column A	Sh-Ctrl Vehicle		Column B	Sh-NFATc2-A Vehicle		Column C	Sh-NFATc2-B Vehicle
Unpaired t test with Welch's correction			Unpaired t test			Unpaired t test
P value	0.0007		P value	<0.0001		P value	<0.0001
P value summary	***		P value summary	****		P value summary	****
Significantly different (P < 0.05)?	Yes		Significantly different (P < 0.05)?	Yes		Significantly different (P < 0.05)?	Yes
One- or two-tailed P value?	Two-tailed		One- or two-tailed P value?	Two-tailed		One- or two-tailed P value?	Two-tailed
Welch-corrected t, df	t=5.808 df=6.903		t, df	t=6.609 df=10		t, df	t=7.3 df=9
How big is the difference?			How big is the difference?			How big is the difference?
Mean ± SEM of column A	113.6 ± 12.58, n=6		Mean ± SEM of column B	45.79 ± 2.484, n=6		Mean ± SEM of column C	51.28 ± 2.859, n=6
Mean ± SEM of column D	33.61 ± 5.595, n=6		Mean ± SEM of column E	12.82 ± 4.325, n=6		Mean ± SEM of column F	10.83 ± 5.041, n=5
Difference between means	-79.99 ± 13.77		Difference between means	-32.97 ± 4.988		Difference between means	-40.45 ± 5.541
95% confidence interval	-112.6 to -47.33		95% confidence interval	-44.08 to -21.85		95% confidence interval	-52.98 to -27.91
R squared (eta squared)	0.8301		R squared (eta squared)	0.8137		R squared (eta squared)	0.8555
F test to compare variances			F test to compare variances			F test to compare variances
F, DFn, Dfd	5.058, 5, 5		F, DFn, Dfd	3.031, 5, 5		F, DFn, Dfd	2.59, 4, 5
P value	0.0997		P value	0.2489		P value	0.3248
P value summary	ns		P value summary	ns		P value summary	ns
Significantly different (P < 0.05)?	No		Significantly different (P < 0.05)?	No		Significantly different (P < 0.05)?	No
Table Analyzed	Figure 4J
Column E	Sh-NFATc2-A Gefitinib 25mg/kg		Column F	Sh-NFATc2-B Gefitinib 25mg/kg
vs.	vs.		vs.	vs.
Column D	Sh-Ctrl Gefitinib 25mg/kg		Column D	Sh-Ctrl Gefitinib 25mg/kg
Unpaired t test			Unpaired t test
P value	0.0148		P value	0.0158
P value summary	*		P value summary	*
Significantly different (P < 0.05)?	Yes		Significantly different (P < 0.05)?	Yes
One- or two-tailed P value?	Two-tailed		One- or two-tailed P value?	Two-tailed
t, df	t=2.94 df=10		t, df	t=2.966 df=9
How big is the difference?			How big is the difference?
Mean ± SEM of column D	33.61 ± 5.595, n=6		Mean ± SEM of column D	33.61 ± 5.595, n=6
Mean ± SEM of column E	12.82 ± 4.325, n=6		Mean ± SEM of column F	10.83 ± 5.041, n=5
Difference between means	-20.79 ± 7.072		Difference between means	-22.78 ± 7.679
95% confidence interval	-36.55 to -5.032		95% confidence interval	-40.15 to -5.406
R squared (eta squared)	0.4636		R squared (eta squared)	0.4943
F test to compare variances			F test to compare variances
F, DFn, Dfd	1.673, 5, 5		F, DFn, Dfd	1.478, 5, 4
P value	0.5859		P value	0.7264
P value summary	ns		P value summary	ns
Significantly different (P < 0.05)?	No		Significantly different (P < 0.05)?	No

## Sheet: Figure4-figure supplement 3A
Days	Tumor volume
	Sh-Ctrl Vehicle						Sh-NFATc2-A Vehicle						Sh-NFATc2-B Vehicle
8	22.685	46.2737	41.4383	47.916	49.4047	26.4475	39.69	43.7289	30.6482	20.4187	0	17.0552	23.9292	27.4337	9.81819	20.0849	0	20.9517
12	39.0902	91.8694	55.1679	45.4833	50.2038	29.5829	13.8235	35.8894	29.276	17.2543	0	27.2812	36.2534	24.8042	23.4467	22.714	13.5751	23.7785
15	46.7301	51.2266	57.1454	44.5813	69.4569	32.8536	30.0357	22.6369	32.1713	14.6473	32.6426	19.435	22.4052	17.4636	29.0528	19.6424	30.2545	19.7954
19	78.1461	59.4293	58.8438	55.0381	88.6811	46.248	35.1731	23.6485	31.9485	25.3765	50.1566	22.8986	24.8328	20.5699	25.7389	20.1818	14.0113	26.3915
22	112.2	110.633	100.001	71.1872	114.083	50.7211	31.361	43.8628	31.9621	38.505	41.8079	43.2823	44.6924	31.1869	28.3547	54.7328	48.195	44.6924
26	153.702	131.477	116.731	71.434	124.78	83.4423	50.3788	39.9012	40.4959	51.2072	52.3414	40.393	61.1444	52.4637	56.8515	47.7897	47.6331	41.7894
Days	Tumor volume
	Sh-Ctrl Gefitinib 25mg/kg						Sh-NFATc2-A Gefitinib 25mg/kg						Sh-NFATc2-B Gefitinib 25mg/kg
8	55.9872	73.7384	50.0745	24.8427	9.4176	52.5171	26.4552	48.594	32.2084	33.2852	35.7443	44.4764	28.978	26.3699	37.1014		22.0323	18.0431
12	48.4557	50.8034	65.1004	65.1004	22.7721	40.5079	30.0519	31.5951	23.3446	53.5348	17.4707	29.9554	20.691	23.8714	34.1519		21.9756	21.7635
15	50.2397	24.95	54.5827	47.6123	33.573	54.1205	16.385	34.2835	25.6916	45.2268	13.7995	21.5125	18.2731	19.2128	31.2691		12.7411	11.0864
19	38.143	40.8726	50.2214	26.0362	21.6419	41.4096	31.7582	0	45.4576	37.3437	14.1041	17.3428	4	22.7877	26.3045		15.6449	7.21064
22	42.7629	34.9065	25.2945	50.7556	11.7742	49.4648	0	0	18.0001	35.6489	16.0099	16.245	0	31.9621	18.3808		19.2487	9.78626
26	52.3346	44.2202	19.5448	30.903	17.531	37.1112	0	0	25.3472	20.3481	14.2939	16.9172	0	26.2777	0		11.1307	16.7442
Calculated by GraphPad Prism7.0
Table Analyzed	Figure4-figure supplement 3A
Two-way RM ANOVA	Matching: Stacked
Alpha	0.05
Source of Variation	% of total variation	P value	P value summary	Significant?
Interaction	25.26	<0.0001	****	Yes
Time	4.212	<0.0001	****	Yes
Column Factor	44.31	<0.0001	****	Yes
Subjects (matching)	10.77	<0.0001	****	Yes
ANOVA table	SS	DF	MS	F (DFn, DFd)	P value
Interaction	31691	25	1268	F (25, 145) = 9.768	P<0.0001
Time	5285	5	1057	F (5, 145) = 8.144	P<0.0001
Column Factor	55593	5	11119	F (5, 29) = 23.85	P<0.0001
Subjects (matching)	13517	29	466.1	F (29, 145) = 3.592	P<0.0001
Residual	18818	145	129.8
Number of missing values	0
Within each row, compare columns (simple effects within rows)
Number of families	6
Number of comparisons per family	15
Alpha	0.05
Tukey's multiple comparisons test	Mean Diff.	95.00% CI of diff.	Significant?	Summary	Adjusted P Value
8
Sh-Ctrl Vehicle vs. Sh-NFATc2-A Vehicle	13.77	-8.91 to 36.45	No	ns	0.5011
Sh-Ctrl Vehicle vs. Sh-NFATc2-B Vehicle	21.99	-0.6894 to 44.67	No	ns	0.0631
Sh-Ctrl Vehicle vs. Sh-Ctrl Gefitinib 25mg/kg	-5.402	-28.08 to 17.28	No	ns	0.9833
Sh-Ctrl Vehicle vs. Sh-NFATc2-A Gefitinib 25mg/kg	2.234	-20.45 to 24.91	No	ns	0.9997
Sh-Ctrl Vehicle vs. Sh-NFATc2-B Gefitinib 25mg/kg	12.52	-11.27 to 36.31	No	ns	0.6538
Sh-NFATc2-A Vehicle vs. Sh-NFATc2-B Vehicle	8.221	-14.46 to 30.9	No	ns	0.9021
Sh-NFATc2-A Vehicle vs. Sh-Ctrl Gefitinib 25mg/kg	-19.17	-41.85 to 3.508	No	ns	0.1497
Sh-NFATc2-A Vehicle vs. Sh-NFATc2-A Gefitinib 25mg/kg	-11.54	-34.22 to 11.14	No	ns	0.6864
Sh-NFATc2-A Vehicle vs. Sh-NFATc2-B Gefitinib 25mg/kg	-1.248	-25.04 to 22.54	No	ns	>0.9999
Sh-NFATc2-B Vehicle vs. Sh-Ctrl Gefitinib 25mg/kg	-27.39	-50.07 to -4.713	Yes	**	0.0082
Sh-NFATc2-B Vehicle vs. Sh-NFATc2-A Gefitinib 25mg/kg	-19.76	-42.44 to 2.923	No	ns	0.1267
Sh-NFATc2-B Vehicle vs. Sh-NFATc2-B Gefitinib 25mg/kg	-9.469	-33.26 to 14.32	No	ns	0.8609
Sh-Ctrl Gefitinib 25mg/kg vs. Sh-NFATc2-A Gefitinib 25mg/kg	7.636	-15.04 to 30.32	No	ns	0.9268
Sh-Ctrl Gefitinib 25mg/kg vs. Sh-NFATc2-B Gefitinib 25mg/kg	17.92	-5.863 to 41.71	No	ns	0.2565
Sh-NFATc2-A Gefitinib 25mg/kg vs. Sh-NFATc2-B Gefitinib 25mg/kg	10.29	-13.5 to 34.08	No	ns	0.8132
12
Sh-Ctrl Vehicle vs. Sh-NFATc2-A Vehicle	31.31	8.632 to 53.99	Yes	**	0.0014
Sh-Ctrl Vehicle vs. Sh-NFATc2-B Vehicle	27.8	5.124 to 50.48	Yes	**	0.0069
Sh-Ctrl Vehicle vs. Sh-Ctrl Gefitinib 25mg/kg	3.11	-19.57 to 25.79	No	ns	0.9987
Sh-Ctrl Vehicle vs. Sh-NFATc2-A Gefitinib 25mg/kg	20.91	-1.773 to 43.59	No	ns	0.0896
Sh-Ctrl Vehicle vs. Sh-NFATc2-B Gefitinib 25mg/kg	27.41	3.621 to 51.2	Yes	*	0.0138
Sh-NFATc2-A Vehicle vs. Sh-NFATc2-B Vehicle	-3.508	-26.19 to 19.17	No	ns	0.9978
Sh-NFATc2-A Vehicle vs. Sh-Ctrl Gefitinib 25mg/kg	-28.2	-50.88 to -5.522	Yes	**	0.0058
Sh-NFATc2-A Vehicle vs. Sh-NFATc2-A Gefitinib 25mg/kg	-10.4	-33.09 to 12.28	No	ns	0.7725
Sh-NFATc2-A Vehicle vs. Sh-NFATc2-B Gefitinib 25mg/kg	-3.903	-27.69 to 19.88	No	ns	0.997
Sh-NFATc2-B Vehicle vs. Sh-Ctrl Gefitinib 25mg/kg	-24.69	-47.38 to -2.014	Yes	*	0.0241
Sh-NFATc2-B Vehicle vs. Sh-NFATc2-A Gefitinib 25mg/kg	-6.897	-29.58 to 15.78	No	ns	0.9517
Sh-NFATc2-B Vehicle vs. Sh-NFATc2-B Gefitinib 25mg/kg	-0.3954	-24.18 to 23.39	No	ns	>0.9999
Sh-Ctrl Gefitinib 25mg/kg vs. Sh-NFATc2-A Gefitinib 25mg/kg	17.8	-4.883 to 40.48	No	ns	0.2158
Sh-Ctrl Gefitinib 25mg/kg vs. Sh-NFATc2-B Gefitinib 25mg/kg	24.3	0.5116 to 48.09	Yes	*	0.0422
Sh-NFATc2-A Gefitinib 25mg/kg vs. Sh-NFATc2-B Gefitinib 25mg/kg	6.501	-17.29 to 30.29	No	ns	0.9693
15
Sh-Ctrl Vehicle vs. Sh-NFATc2-A Vehicle	25.07	2.39 to 47.75	Yes	*	0.0209
Sh-Ctrl Vehicle vs. Sh-NFATc2-B Vehicle	27.23	4.549 to 49.91	Yes	**	0.0088
Sh-Ctrl Vehicle vs. Sh-Ctrl Gefitinib 25mg/kg	6.153	-16.53 to 28.83	No	ns	0.9703
Sh-Ctrl Vehicle vs. Sh-NFATc2-A Gefitinib 25mg/kg	24.18	1.502 to 46.86	Yes	*	0.0292
Sh-Ctrl Vehicle vs. Sh-NFATc2-B Gefitinib 25mg/kg	31.82	8.028 to 55.6	Yes	**	0.0022
Sh-NFATc2-A Vehicle vs. Sh-NFATc2-B Vehicle	2.159	-20.52 to 24.84	No	ns	0.9998
Sh-NFATc2-A Vehicle vs. Sh-Ctrl Gefitinib 25mg/kg	-18.92	-41.6 to 3.762	No	ns	0.1607
Sh-NFATc2-A Vehicle vs. Sh-NFATc2-A Gefitinib 25mg/kg	-0.8884	-23.57 to 21.79	No	ns	>0.9999
Sh-NFATc2-A Vehicle vs. Sh-NFATc2-B Gefitinib 25mg/kg	6.745	-17.04 to 30.53	No	ns	0.9641
Sh-NFATc2-B Vehicle vs. Sh-Ctrl Gefitinib 25mg/kg	-21.08	-43.76 to 1.603	No	ns	0.0849
Sh-NFATc2-B Vehicle vs. Sh-NFATc2-A Gefitinib 25mg/kg	-3.048	-25.73 to 19.63	No	ns	0.9989
Sh-NFATc2-B Vehicle vs. Sh-NFATc2-B Gefitinib 25mg/kg	4.586	-19.2 to 28.37	No	ns	0.9936
Sh-Ctrl Gefitinib 25mg/kg vs. Sh-NFATc2-A Gefitinib 25mg/kg	18.03	-4.651 to 40.71	No	ns	0.2034
Sh-Ctrl Gefitinib 25mg/kg vs. Sh-NFATc2-B Gefitinib 25mg/kg	25.66	1.876 to 49.45	Yes	*	0.0263
Sh-NFATc2-A Gefitinib 25mg/kg vs. Sh-NFATc2-B Gefitinib 25mg/kg	7.633	-16.15 to 31.42	No	ns	0.9397
19
Sh-Ctrl Vehicle vs. Sh-NFATc2-A Vehicle	32.86	10.18 to 55.54	Yes	***	0.0007
Sh-Ctrl Vehicle vs. Sh-NFATc2-B Vehicle	42.44	19.76 to 65.12	Yes	****	<0.0001
Sh-Ctrl Vehicle vs. Sh-Ctrl Gefitinib 25mg/kg	28.01	5.33 to 50.69	Yes	**	0.0063
Sh-Ctrl Vehicle vs. Sh-NFATc2-A Gefitinib 25mg/kg	40.06	17.38 to 62.74	Yes	****	<0.0001
Sh-Ctrl Vehicle vs. Sh-NFATc2-B Gefitinib 25mg/kg	49.21	25.42 to 73	Yes	****	<0.0001
Sh-NFATc2-A Vehicle vs. Sh-NFATc2-B Vehicle	9.579	-13.1 to 32.26	No	ns	0.828
Sh-NFATc2-A Vehicle vs. Sh-Ctrl Gefitinib 25mg/kg	-4.854	-27.53 to 17.83	No	ns	0.9897
Sh-NFATc2-A Vehicle vs. Sh-NFATc2-A Gefitinib 25mg/kg	7.199	-15.48 to 29.88	No	ns	0.9423
Sh-NFATc2-A Vehicle vs. Sh-NFATc2-B Gefitinib 25mg/kg	16.34	-7.444 to 40.13	No	ns	0.358
Sh-NFATc2-B Vehicle vs. Sh-Ctrl Gefitinib 25mg/kg	-14.43	-37.11 to 8.248	No	ns	0.4469
Sh-NFATc2-B Vehicle vs. Sh-NFATc2-A Gefitinib 25mg/kg	-2.38	-25.06 to 20.3	No	ns	0.9997
Sh-NFATc2-B Vehicle vs. Sh-NFATc2-B Gefitinib 25mg/kg	6.765	-17.02 to 30.55	No	ns	0.9636
Sh-Ctrl Gefitinib 25mg/kg vs. Sh-NFATc2-A Gefitinib 25mg/kg	12.05	-10.63 to 34.73	No	ns	0.6445
Sh-Ctrl Gefitinib 25mg/kg vs. Sh-NFATc2-B Gefitinib 25mg/kg	21.2	-2.59 to 44.99	No	ns	0.1108
Sh-NFATc2-A Gefitinib 25mg/kg vs. Sh-NFATc2-B Gefitinib 25mg/kg	9.145	-14.64 to 32.93	No	ns	0.8776
22
Sh-Ctrl Vehicle vs. Sh-NFATc2-A Vehicle	54.67	31.99 to 77.35	Yes	****	<0.0001
Sh-Ctrl Vehicle vs. Sh-NFATc2-B Vehicle	51.16	28.48 to 73.84	Yes	****	<0.0001
Sh-Ctrl Vehicle vs. Sh-Ctrl Gefitinib 25mg/kg	57.31	34.63 to 79.99	Yes	****	<0.0001
Sh-Ctrl Vehicle vs. Sh-NFATc2-A Gefitinib 25mg/kg	78.82	56.14 to 101.5	Yes	****	<0.0001
Sh-Ctrl Vehicle vs. Sh-NFATc2-B Gefitinib 25mg/kg	77.26	53.47 to 101	Yes	****	<0.0001
Sh-NFATc2-A Vehicle vs. Sh-NFATc2-B Vehicle	-3.512	-26.19 to 19.17	No	ns	0.9977
Sh-NFATc2-A Vehicle vs. Sh-Ctrl Gefitinib 25mg/kg	2.637	-20.04 to 25.32	No	ns	0.9994
Sh-NFATc2-A Vehicle vs. Sh-NFATc2-A Gefitinib 25mg/kg	24.15	1.466 to 46.83	Yes	*	0.0296
Sh-NFATc2-A Vehicle vs. Sh-NFATc2-B Gefitinib 25mg/kg	22.59	-1.2 to 46.38	No	ns	0.0733
Sh-NFATc2-B Vehicle vs. Sh-Ctrl Gefitinib 25mg/kg	6.149	-16.53 to 28.83	No	ns	0.9704
Sh-NFATc2-B Vehicle vs. Sh-NFATc2-A Gefitinib 25mg/kg	27.66	4.978 to 50.34	Yes	**	0.0073
Sh-NFATc2-B Vehicle vs. Sh-NFATc2-B Gefitinib 25mg/kg	26.1	2.312 to 49.89	Yes	*	0.0224
Sh-Ctrl Gefitinib 25mg/kg vs. Sh-NFATc2-A Gefitinib 25mg/kg	21.51	-1.172 to 44.19	No	ns	0.074
Sh-Ctrl Gefitinib 25mg/kg vs. Sh-NFATc2-B Gefitinib 25mg/kg	19.95	-3.837 to 43.74	No	ns	0.1561
Sh-NFATc2-A Gefitinib 25mg/kg vs. Sh-NFATc2-B Gefitinib 25mg/kg	-1.558	-25.35 to 22.23	No	ns	>0.9999
26
Sh-Ctrl Vehicle vs. Sh-NFATc2-A Vehicle	67.81	45.13 to 90.49	Yes	****	<0.0001
Sh-Ctrl Vehicle vs. Sh-NFATc2-B Vehicle	62.32	39.64 to 85	Yes	****	<0.0001
Sh-Ctrl Vehicle vs. Sh-Ctrl Gefitinib 25mg/kg	79.99	57.31 to 102.7	Yes	****	<0.0001
Sh-Ctrl Vehicle vs. Sh-NFATc2-A Gefitinib 25mg/kg	100.8	78.1 to 123.5	Yes	****	<0.0001
Sh-Ctrl Vehicle vs. Sh-NFATc2-B Gefitinib 25mg/kg	102.8	78.98 to 126.6	Yes	****	<0.0001
Sh-NFATc2-A Vehicle vs. Sh-NFATc2-B Vehicle	-5.492	-28.17 to 17.19	No	ns	0.982
Sh-NFATc2-A Vehicle vs. Sh-Ctrl Gefitinib 25mg/kg	12.18	-10.5 to 34.86	No	ns	0.6341
Sh-NFATc2-A Vehicle vs. Sh-NFATc2-A Gefitinib 25mg/kg	32.97	10.29 to 55.65	Yes	***	0.0006
Sh-NFATc2-A Vehicle vs. Sh-NFATc2-B Gefitinib 25mg/kg	34.96	11.17 to 58.74	Yes	***	0.0005
Sh-NFATc2-B Vehicle vs. Sh-Ctrl Gefitinib 25mg/kg	17.67	-5.01 to 40.35	No	ns	0.2227
Sh-NFATc2-B Vehicle vs. Sh-NFATc2-A Gefitinib 25mg/kg	38.46	15.78 to 61.14	Yes	****	<0.0001
Sh-NFATc2-B Vehicle vs. Sh-NFATc2-B Gefitinib 25mg/kg	40.45	16.66 to 64.24	Yes	****	<0.0001
Sh-Ctrl Gefitinib 25mg/kg vs. Sh-NFATc2-A Gefitinib 25mg/kg	20.79	-1.891 to 43.47	No	ns	0.0929
Sh-Ctrl Gefitinib 25mg/kg vs. Sh-NFATc2-B Gefitinib 25mg/kg	22.78	-1.011 to 46.56	No	ns	0.0691
Sh-NFATc2-A Gefitinib 25mg/kg vs. Sh-NFATc2-B Gefitinib 25mg/kg	1.987	-21.8 to 25.77	No	ns	0.9999
Test details	Mean 1	Mean 2	Mean Diff.	SE of diff.	N1	N2	q	DF
8
Sh-Ctrl Vehicle vs. Sh-NFATc2-A Vehicle	39.03	25.26	13.77	7.87	6	6	2.474	174
Sh-Ctrl Vehicle vs. Sh-NFATc2-B Vehicle	39.03	17.04	21.99	7.87	6	6	3.952	174
Sh-Ctrl Vehicle vs. Sh-Ctrl Gefitinib 25mg/kg	39.03	44.43	-5.402	7.87	6	6	0.9707	174
Sh-Ctrl Vehicle vs. Sh-NFATc2-A Gefitinib 25mg/kg	39.03	36.79	2.234	7.87	6	6	0.4014	174
Sh-Ctrl Vehicle vs. Sh-NFATc2-B Gefitinib 25mg/kg	39.03	26.5	12.52	8.255	6	5	2.145	174
Sh-NFATc2-A Vehicle vs. Sh-NFATc2-B Vehicle	25.26	17.04	8.221	7.87	6	6	1.477	174
Sh-NFATc2-A Vehicle vs. Sh-Ctrl Gefitinib 25mg/kg	25.26	44.43	-19.17	7.87	6	6	3.445	174
Sh-NFATc2-A Vehicle vs. Sh-NFATc2-A Gefitinib 25mg/kg	25.26	36.79	-11.54	7.87	6	6	2.073	174
Sh-NFATc2-A Vehicle vs. Sh-NFATc2-B Gefitinib 25mg/kg	25.26	26.5	-1.248	8.255	6	5	0.2138	174
Sh-NFATc2-B Vehicle vs. Sh-Ctrl Gefitinib 25mg/kg	17.04	44.43	-27.39	7.87	6	6	4.922	174
Sh-NFATc2-B Vehicle vs. Sh-NFATc2-A Gefitinib 25mg/kg	17.04	36.79	-19.76	7.87	6	6	3.55	174
Sh-NFATc2-B Vehicle vs. Sh-NFATc2-B Gefitinib 25mg/kg	17.04	26.5	-9.469	8.255	6	5	1.622	174
Sh-Ctrl Gefitinib 25mg/kg vs. Sh-NFATc2-A Gefitinib 25mg/kg	44.43	36.79	7.636	7.87	6	6	1.372	174
Sh-Ctrl Gefitinib 25mg/kg vs. Sh-NFATc2-B Gefitinib 25mg/kg	44.43	26.5	17.92	8.255	6	5	3.071	174
Sh-NFATc2-A Gefitinib 25mg/kg vs. Sh-NFATc2-B Gefitinib 25mg/kg	36.79	26.5	10.29	8.255	6	5	1.763	174
12
Sh-Ctrl Vehicle vs. Sh-NFATc2-A Vehicle	51.9	20.59	31.31	7.87	6	6	5.626	174
Sh-Ctrl Vehicle vs. Sh-NFATc2-B Vehicle	51.9	24.1	27.8	7.87	6	6	4.996	174
Sh-Ctrl Vehicle vs. Sh-Ctrl Gefitinib 25mg/kg	51.9	48.79	3.11	7.87	6	6	0.5588	174
Sh-Ctrl Vehicle vs. Sh-NFATc2-A Gefitinib 25mg/kg	51.9	30.99	20.91	7.87	6	6	3.757	174
Sh-Ctrl Vehicle vs. Sh-NFATc2-B Gefitinib 25mg/kg	51.9	24.49	27.41	8.255	6	5	4.696	174
Sh-NFATc2-A Vehicle vs. Sh-NFATc2-B Vehicle	20.59	24.1	-3.508	7.87	6	6	0.6303	174
Sh-NFATc2-A Vehicle vs. Sh-Ctrl Gefitinib 25mg/kg	20.59	48.79	-28.2	7.87	6	6	5.068	174
Sh-NFATc2-A Vehicle vs. Sh-NFATc2-A Gefitinib 25mg/kg	20.59	30.99	-10.4	7.87	6	6	1.87	174
Sh-NFATc2-A Vehicle vs. Sh-NFATc2-B Gefitinib 25mg/kg	20.59	24.49	-3.903	8.255	6	5	0.6687	174
Sh-NFATc2-B Vehicle vs. Sh-Ctrl Gefitinib 25mg/kg	24.1	48.79	-24.69	7.87	6	6	4.437	174
Sh-NFATc2-B Vehicle vs. Sh-NFATc2-A Gefitinib 25mg/kg	24.1	30.99	-6.897	7.87	6	6	1.239	174
Sh-NFATc2-B Vehicle vs. Sh-NFATc2-B Gefitinib 25mg/kg	24.1	24.49	-0.3954	8.255	6	5	0.06773	174
Sh-Ctrl Gefitinib 25mg/kg vs. Sh-NFATc2-A Gefitinib 25mg/kg	48.79	30.99	17.8	7.87	6	6	3.198	174
Sh-Ctrl Gefitinib 25mg/kg vs. Sh-NFATc2-B Gefitinib 25mg/kg	48.79	24.49	24.3	8.255	6	5	4.163	174
Sh-NFATc2-A Gefitinib 25mg/kg vs. Sh-NFATc2-B Gefitinib 25mg/kg	30.99	24.49	6.501	8.255	6	5	1.114	174
15
Sh-Ctrl Vehicle vs. Sh-NFATc2-A Vehicle	50.33	25.26	25.07	7.87	6	6	4.505	174
Sh-Ctrl Vehicle vs. Sh-NFATc2-B Vehicle	50.33	23.1	27.23	7.87	6	6	4.893	174
Sh-Ctrl Vehicle vs. Sh-Ctrl Gefitinib 25mg/kg	50.33	44.18	6.153	7.87	6	6	1.106	174
Sh-Ctrl Vehicle vs. Sh-NFATc2-A Gefitinib 25mg/kg	50.33	26.15	24.18	7.87	6	6	4.345	174
Sh-Ctrl Vehicle vs. Sh-NFATc2-B Gefitinib 25mg/kg	50.33	18.52	31.82	8.255	6	5	5.451	174
Sh-NFATc2-A Vehicle vs. Sh-NFATc2-B Vehicle	25.26	23.1	2.159	7.87	6	6	0.388	174
Sh-NFATc2-A Vehicle vs. Sh-Ctrl Gefitinib 25mg/kg	25.26	44.18	-18.92	7.87	6	6	3.399	174
Sh-NFATc2-A Vehicle vs. Sh-NFATc2-A Gefitinib 25mg/kg	25.26	26.15	-0.8884	7.87	6	6	0.1596	174
Sh-NFATc2-A Vehicle vs. Sh-NFATc2-B Gefitinib 25mg/kg	25.26	18.52	6.745	8.255	6	5	1.156	174
Sh-NFATc2-B Vehicle vs. Sh-Ctrl Gefitinib 25mg/kg	23.1	44.18	-21.08	7.87	6	6	3.787	174
Sh-NFATc2-B Vehicle vs. Sh-NFATc2-A Gefitinib 25mg/kg	23.1	26.15	-3.048	7.87	6	6	0.5476	174
Sh-NFATc2-B Vehicle vs. Sh-NFATc2-B Gefitinib 25mg/kg	23.1	18.52	4.586	8.255	6	5	0.7857	174
Sh-Ctrl Gefitinib 25mg/kg vs. Sh-NFATc2-A Gefitinib 25mg/kg	44.18	26.15	18.03	7.87	6	6	3.24	174
Sh-Ctrl Gefitinib 25mg/kg vs. Sh-NFATc2-B Gefitinib 25mg/kg	44.18	18.52	25.66	8.255	6	5	4.397	174
Sh-NFATc2-A Gefitinib 25mg/kg vs. Sh-NFATc2-B Gefitinib 25mg/kg	26.15	18.52	7.633	8.255	6	5	1.308	174
19
Sh-Ctrl Vehicle vs. Sh-NFATc2-A Vehicle	64.4	31.53	32.86	7.87	6	6	5.905	174
Sh-Ctrl Vehicle vs. Sh-NFATc2-B Vehicle	64.4	21.95	42.44	7.87	6	6	7.626	174
Sh-Ctrl Vehicle vs. Sh-Ctrl Gefitinib 25mg/kg	64.4	36.39	28.01	7.87	6	6	5.033	174
Sh-Ctrl Vehicle vs. Sh-NFATc2-A Gefitinib 25mg/kg	64.4	24.33	40.06	7.87	6	6	7.199	174
Sh-Ctrl Vehicle vs. Sh-NFATc2-B Gefitinib 25mg/kg	64.4	15.19	49.21	8.255	6	5	8.431	174
Sh-NFATc2-A Vehicle vs. Sh-NFATc2-B Vehicle	31.53	21.95	9.579	7.87	6	6	1.721	174
Sh-NFATc2-A Vehicle vs. Sh-Ctrl Gefitinib 25mg/kg	31.53	36.39	-4.854	7.87	6	6	0.8722	174
Sh-NFATc2-A Vehicle vs. Sh-NFATc2-A Gefitinib 25mg/kg	31.53	24.33	7.199	7.87	6	6	1.294	174
Sh-NFATc2-A Vehicle vs. Sh-NFATc2-B Gefitinib 25mg/kg	31.53	15.19	16.34	8.255	6	5	2.8	174
Sh-NFATc2-B Vehicle vs. Sh-Ctrl Gefitinib 25mg/kg	21.95	36.39	-14.43	7.87	6	6	2.593	174
Sh-NFATc2-B Vehicle vs. Sh-NFATc2-A Gefitinib 25mg/kg	21.95	24.33	-2.38	7.87	6	6	0.4277	174
Sh-NFATc2-B Vehicle vs. Sh-NFATc2-B Gefitinib 25mg/kg	21.95	15.19	6.765	8.255	6	5	1.159	174
Sh-Ctrl Gefitinib 25mg/kg vs. Sh-NFATc2-A Gefitinib 25mg/kg	36.39	24.33	12.05	7.87	6	6	2.166	174
Sh-Ctrl Gefitinib 25mg/kg vs. Sh-NFATc2-B Gefitinib 25mg/kg	36.39	15.19	21.2	8.255	6	5	3.632	174
Sh-NFATc2-A Gefitinib 25mg/kg vs. Sh-NFATc2-B Gefitinib 25mg/kg	24.33	15.19	9.145	8.255	6	5	1.567	174
22
Sh-Ctrl Vehicle vs. Sh-NFATc2-A Vehicle	93.14	38.46	54.67	7.87	6	6	9.824	174
Sh-Ctrl Vehicle vs. Sh-NFATc2-B Vehicle	93.14	41.98	51.16	7.87	6	6	9.193	174
Sh-Ctrl Vehicle vs. Sh-Ctrl Gefitinib 25mg/kg	93.14	35.83	57.31	7.87	6	6	10.3	174
Sh-Ctrl Vehicle vs. Sh-NFATc2-A Gefitinib 25mg/kg	93.14	14.32	78.82	7.87	6	6	14.16	174
Sh-Ctrl Vehicle vs. Sh-NFATc2-B Gefitinib 25mg/kg	93.14	15.88	77.26	8.255	6	5	13.24	174
Sh-NFATc2-A Vehicle vs. Sh-NFATc2-B Vehicle	38.46	41.98	-3.512	7.87	6	6	0.6311	174
Sh-NFATc2-A Vehicle vs. Sh-Ctrl Gefitinib 25mg/kg	38.46	35.83	2.637	7.87	6	6	0.4739	174
Sh-NFATc2-A Vehicle vs. Sh-NFATc2-A Gefitinib 25mg/kg	38.46	14.32	24.15	7.87	6	6	4.339	174
Sh-NFATc2-A Vehicle vs. Sh-NFATc2-B Gefitinib 25mg/kg	38.46	15.88	22.59	8.255	6	5	3.87	174
Sh-NFATc2-B Vehicle vs. Sh-Ctrl Gefitinib 25mg/kg	41.98	35.83	6.149	7.87	6	6	1.105	174
Sh-NFATc2-B Vehicle vs. Sh-NFATc2-A Gefitinib 25mg/kg	41.98	14.32	27.66	7.87	6	6	4.97	174
Sh-NFATc2-B Vehicle vs. Sh-NFATc2-B Gefitinib 25mg/kg	41.98	15.88	26.1	8.255	6	5	4.472	174
Sh-Ctrl Gefitinib 25mg/kg vs. Sh-NFATc2-A Gefitinib 25mg/kg	35.83	14.32	21.51	7.87	6	6	3.865	174
Sh-Ctrl Gefitinib 25mg/kg vs. Sh-NFATc2-B Gefitinib 25mg/kg	35.83	15.88	19.95	8.255	6	5	3.418	174
Sh-NFATc2-A Gefitinib 25mg/kg vs. Sh-NFATc2-B Gefitinib 25mg/kg	14.32	15.88	-1.558	8.255	6	5	0.267	174
26
Sh-Ctrl Vehicle vs. Sh-NFATc2-A Vehicle	113.6	45.79	67.81	7.87	6	6	12.18	174
Sh-Ctrl Vehicle vs. Sh-NFATc2-B Vehicle	113.6	51.28	62.32	7.87	6	6	11.2	174
Sh-Ctrl Vehicle vs. Sh-Ctrl Gefitinib 25mg/kg	113.6	33.61	79.99	7.87	6	6	14.37	174
Sh-Ctrl Vehicle vs. Sh-NFATc2-A Gefitinib 25mg/kg	113.6	12.82	100.8	7.87	6	6	18.11	174
Sh-Ctrl Vehicle vs. Sh-NFATc2-B Gefitinib 25mg/kg	113.6	10.83	102.8	8.255	6	5	17.61	174
Sh-NFATc2-A Vehicle vs. Sh-NFATc2-B Vehicle	45.79	51.28	-5.492	7.87	6	6	0.9869	174
Sh-NFATc2-A Vehicle vs. Sh-Ctrl Gefitinib 25mg/kg	45.79	33.61	12.18	7.87	6	6	2.188	174
Sh-NFATc2-A Vehicle vs. Sh-NFATc2-A Gefitinib 25mg/kg	45.79	12.82	32.97	7.87	6	6	5.924	174
Sh-NFATc2-A Vehicle vs. Sh-NFATc2-B Gefitinib 25mg/kg	45.79	10.83	34.96	8.255	6	5	5.989	174
Sh-NFATc2-B Vehicle vs. Sh-Ctrl Gefitinib 25mg/kg	51.28	33.61	17.67	7.87	6	6	3.175	174
Sh-NFATc2-B Vehicle vs. Sh-NFATc2-A Gefitinib 25mg/kg	51.28	12.82	38.46	7.87	6	6	6.911	174
Sh-NFATc2-B Vehicle vs. Sh-NFATc2-B Gefitinib 25mg/kg	51.28	10.83	40.45	8.255	6	5	6.93	174
Sh-Ctrl Gefitinib 25mg/kg vs. Sh-NFATc2-A Gefitinib 25mg/kg	33.61	12.82	20.79	7.87	6	6	3.736	174
Sh-Ctrl Gefitinib 25mg/kg vs. Sh-NFATc2-B Gefitinib 25mg/kg	33.61	10.83	22.78	8.255	6	5	3.902	174
Sh-NFATc2-A Gefitinib 25mg/kg vs. Sh-NFATc2-B Gefitinib 25mg/kg	12.82	10.83	1.987	8.255	6	5	0.3405	174
