# Supplementary material for: NFATc2 enhances tumor-initiating phenotypes through the NFATc2/SOX2/ALDH axis in lung adenocarcinoma
Source: eLife. 2017 Jul 24;6:e26733. doi: 10.7554/eLife.26733 (PMC5570574; doi:10.7554/eLife.26733)
Supplement: Figure 6—source data 1. — DOI: http://dx.doi.org/10.7554/eLife.26733.020 [file elife-26733-fig6-data1.xlsx]

## Sheet: Figure 6F
A549
Site 4	Relative expression	Mean	std	Fold enrichment	Mean	std
RFP IgG	0.954173
RFP IgG	1.12773
RFP IgG	0.88372
RFP IgG	1.30006	1.06642	0.186482
RFP NFATc2 Ab	2.23524			0.71048
RFP NFATc2 Ab	3.64246			1.15777
RFP NFATc2 Ab	3.7156			1.18102
RFP NFATc2 Ab	2.99107	3.14609	0.689061	0.950725	1	0.219021
RFP-NFATc2 IgG	1.57084
RFP-NFATc2 IgG	0.664234
RFP-NFATc2 IgG	1.12285
RFP-NFATc2 IgG	1.83023	1.29704	0.587402
RFP-NFATc2 NFATc2 Ab	6.82516			2.16941
RFP-NFATc2 NFATc2 Ab	5.38488			1.71161
RFP-NFATc2 NFATc2 Ab	9.10474			2.89398
RFP-NFATc2 NFATc2 Ab	8.10931	7.35602	1.61169	2.57758	2.33815	0.512284
Table Analyzed	Site 4 Fold enrichment
Column B	RFP-NFATc2 NFATc2 Ab
vs.	vs.
Column A	RFP NFATc2 Ab
Unpaired t test
P value	0.003
P value summary	**
Significantly different (P < 0.05)?	Yes
One- or two-tailed P value?	Two-tailed
t, df	t=4.804 df=6
How big is the difference?
Mean ± SEM of column A	1 ± 0.1095, n=4
Mean ± SEM of column B	2.338 ± 0.2561, n=4
Difference between means	1.338 ± 0.2786
95% confidence interval	0.6565 to 2.02
R squared (eta squared)	0.7936
F test to compare variances
F, DFn, Dfd	5.471, 3, 3
P value	0.1964
P value summary	ns
Significantly different (P < 0.05)?	No
Site 5	Relative expression	Mean	std	Fold enrichment	Mean	std
RFP IgG	1.02459
RFP IgG	1.26341
RFP IgG	0.792378	1.02679	0.257934
RFP NFATc2 Ab	1.50159			0.796168
RFP NFATc2 Ab	2.0213			1.07173
RFP NFATc2 Ab	2.13516	1.88602	0.768454	1.1321	1	0.179086
RFP-NFATc2 IgG	0.900994
RFP-NFATc2 IgG	1.18392
RFP-NFATc2 IgG	0.956183	1.0137	0.182
RFP-NFATc2 NFATc2 Ab	4.06918			2.15755
RFP-NFATc2 NFATc2 Ab	6.19889			3.28676
RFP-NFATc2 NFATc2 Ab	5.74323	5.3371	1.18771	3.04516	2.82983	0.594608
Table Analyzed	Site 5 Fold enrichment
Column B	RFP-NFATc2 NFATc2 Ab
vs.	vs.
Column A	RFP NFATc2 Ab
Unpaired t test
P value	0.007
P value summary	**
Significantly different (P < 0.05)?	Yes
One- or two-tailed P value?	Two-tailed
t, df	t=5.104 df=4
How big is the difference?
Mean ± SEM of column A	1 ± 0.1034, n=3
Mean ± SEM of column B	2.83 ± 0.3433, n=3
Difference between means	1.83 ± 0.3585
95% confidence interval	0.8344 to 2.825
R squared (eta squared)	0.8669
F test to compare variances
F, DFn, Dfd	11.02, 2, 2
P value	0.1663
P value summary	ns
Significantly different (P < 0.05)?	No

## Sheet: Figure 6i
	mRNA level relative to BEAS-2B
Cell lines	NFATc2	SOX2
H1993	0.0092361	52.8343
HCC1833	0.719264	200.429
HKUCL4	1.1102	43.856
H358	2.12469	894.33
H1650	4.30849	187.284
H2228	6.91696	30.8292
H1299	7.82609	1769.04
H1437	15.2341	1.8333
HKUCL1	18.1949	50.664
PDCL#24	18.9759	29.9278
H1975	19.2027	1697.37
H23	21.0739	1935.57
HCC366	25.3427	45.6729
HKULC3	27.8491	360.251
H2122	28.8924	1340.84
HKUCL2	34.8028	5.16622
HCC827	35.2169	5867.39
HCC78	36.0229	882.166
FA31	40.8998	4783.98
A549	98.507	6813.81
H441	105.511	10913.7
Calculated by GraphPad Prism7.0
Pearson r
r	0.8584
95% confidence interval	0.6779 to 0.9413
R squared	0.7368
P value
P (two-tailed)	<0.0001
P value summary	****
Significant? (alpha = 0.05)	Yes
Number of XY Pairs	21
