# Supplementary material for: NFATc2 enhances tumor-initiating phenotypes through the NFATc2/SOX2/ALDH axis in lung adenocarcinoma
Source: eLife. 2017 Jul 24;6:e26733. doi: 10.7554/eLife.26733 (PMC5570574; doi:10.7554/eLife.26733)
Supplement: Figure 7—source data 1. — DOI: http://dx.doi.org/10.7554/eLife.26733.023 [file elife-26733-fig7-data1.xlsx]

## Sheet: Figure 7A
	Sh-Ctrl				ShNFATc2-A				ShNFATc2-B
% of cell	Exp#1	Exp#2	Exp#3	Exp#4	Exp#1	Exp#2	Exp#3	Exp#4	Exp#1	Exp#2	Exp#3	Exp#4
ALDH+	17.2	20.87	23.05	25.26	11.24	11.27	9.44	9	4.55	4.26	5.659	5.951
CD44+	22.5	26.07	29.95	28.16	8.65	12.46	22.72	23.7	48.84	46.71	10.179	10.061
ALDH+/CD44+	5.8	7.97	5.35	5.16	1.5	2.06	1.02	1	2.24	1.81	0.469	0.501
Statistical analysis performed by GraphPad Prism 7.0
Table Analyzed	Figure 5B A+		Table Analyzed	Figure 5B A+
Column B	ShNFATc2-A		Column C	ShNFATc2-B
vs.	vs.		vs.	vs.
Column A	Sh-Ctrl		Column A	Sh-Ctrl
Unpaired t test			Unpaired t test
P value	0.0008		P value	<0.0001
P value summary	***		P value summary	****
Significantly different (P < 0.05)?	Yes		Significantly different (P < 0.05)?	Yes
One- or two-tailed P value?	Two-tailed		One- or two-tailed P value?	Two-tailed
t, df	t=6.25 df=6		t, df	t=9.336 df=6
How big is the difference?			How big is the difference?
Mean ± SEM of column A	21.6 ± 1.717, n=4		Mean ± SEM of column A	21.6 ± 1.717, n=4
Mean ± SEM of column B	10.24 ± 0.5943, n=4		Mean ± SEM of column C	5.105 ± 0.4128, n=4
Difference between means	-11.36 ± 1.817		Difference between means	-16.49 ± 1.766
95% confidence interval	-15.8 to -6.911		95% confidence interval	-20.81 to -12.17
R squared (eta squared)	0.8668		R squared (eta squared)	0.9356
F test to compare variances			F test to compare variances
F, DFn, Dfd	8.35, 3, 3		F, DFn, Dfd	17.31, 3, 3
P value	0.1149		P value	0.0426
P value summary	ns		P value summary	*
Significantly different (P < 0.05)?	No		Significantly different (P < 0.05)?	Yes
Table Analyzed	Figure 5B C+		Table Analyzed	Figure 5B C+
Column B	ShNFATc2-A		Column C	ShNFATc2-B
vs.	vs.		vs.	vs.
Column A	Sh-Ctrl		Column A	Sh-Ctrl
Unpaired t test			Unpaired t test
P value	0.0529		P value	0.8428
P value summary	ns		P value summary	ns
Significantly different (P < 0.05)?	No		Significantly different (P < 0.05)?	No
One- or two-tailed P value?	Two-tailed		One- or two-tailed P value?	Two-tailed
t, df	t=2.406 df=6		t, df	t=0.2071 df=6
How big is the difference?			How big is the difference?
Mean ± SEM of column A	26.67 ± 1.6, n=4		Mean ± SEM of column A	26.67 ± 1.6, n=4
Mean ± SEM of column B	16.88 ± 3.74, n=4		Mean ± SEM of column C	28.95 ± 10.88, n=4
Difference between means	-9.788 ± 4.068		Difference between means	2.278 ± 11
95% confidence interval	-19.74 to 0.1673		95% confidence interval	-24.63 to 29.18
R squared (eta squared)	0.491		R squared (eta squared)	0.007099
F test to compare variances			F test to compare variances
F, DFn, Dfd	5.464, 3, 3		F, DFn, Dfd	46.22, 3, 3
P value	0.1967		P value	0.0104
P value summary	ns		P value summary	*
Significantly different (P < 0.05)?	No		Significantly different (P < 0.05)?	Yes
Was the pairing significantly effective?	Yes		Was the pairing significantly effective?	No
Table Analyzed	Figure 5B A+C+		Table Analyzed	Figure 5B A+C+
Column B	ShNFATc2-A		Column C	ShNFATc2-B
vs.	vs.		vs.	vs.
Column A	Sh-Ctrl		Column A	Sh-Ctrl
Unpaired t test			Unpaired t test
P value	0.0005		P value	0.0009
P value summary	***		P value summary	***
Significantly different (P < 0.05)?	Yes		Significantly different (P < 0.05)?	Yes
One- or two-tailed P value?	Two-tailed		One- or two-tailed P value?	Two-tailed
t, df	t=6.737 df=6		t, df	t=6.093 df=6
How big is the difference?			How big is the difference?
Mean ± SEM of column A	6.07 ± 0.6474, n=4		Mean ± SEM of column A	6.07 ± 0.6474, n=4
Mean ± SEM of column B	1.395 ± 0.25, n=4		Mean ± SEM of column C	1.255 ± 0.4532, n=4
Difference between means	-4.675 ± 0.694		Difference between means	-4.815 ± 0.7903
95% confidence interval	-6.373 to -2.977		95% confidence interval	-6.749 to -2.881
R squared (eta squared)	0.8832		R squared (eta squared)	0.8609
F test to compare variances			F test to compare variances
F, DFn, Dfd	6.707, 3, 3		F, DFn, Dfd	2.041, 3, 3
P value	0.1524		P value	0.5729
P value summary	ns		P value summary	ns
Significantly different (P < 0.05)?	No		Significantly different (P < 0.05)?	No

## Sheet: Figure 7B
	Vector-Ctrl			gNFATc2
% of cell	Exp#1	Exp#2	Exp#3	Exp#1	Exp#2	Exp#3
ALDH+	17.2	20.87	23.05	11.24	11.27	9.44
CD44+	22.5	26.07	29.95	8.65	12.46	22.72
ALDH+/CD44+	5.8	7.97	5.35	1.5	2.06	1.02
Statistical analysis performed by GraphPad Prism 7.0
Table Analyzed	Figure 5C A+
Column B	gNFATc2
vs.	vs.
Column A	Vector-Ctrl
Unpaired t test
P value	0.0058
P value summary	**
Significantly different (P < 0.05)?	Yes
One- or two-tailed P value?	Two-tailed
t, df	t=5.369 df=4
How big is the difference?
Mean ± SEM of column A	20.37 ± 1.707, n=3
Mean ± SEM of column B	10.65 ± 0.6051, n=3
Difference between means	-9.723 ± 1.811
95% confidence interval	-14.75 to -4.695
R squared (eta squared)	0.8782
F test to compare variances
F, DFn, Dfd	7.958, 2, 2
P value	0.2233
P value summary	ns
Significantly different (P < 0.05)?	No
Table Analyzed	Figure 5C C+
Column B	gNFATc2
vs.	vs.
Column A	Vector-Ctrl
Unpaired t test
P value	0.0705
P value summary	ns
Significantly different (P < 0.05)?	No
One- or two-tailed P value?	Two-tailed
t, df	t=2.45 df=4
How big is the difference?
Mean ± SEM of column A	26.17 ± 2.151, n=3
Mean ± SEM of column B	14.61 ± 4.202, n=3
Difference between means	-11.56 ± 4.72
95% confidence interval	-24.67 to 1.542
R squared (eta squared)	0.6
F test to compare variances
F, DFn, Dfd	3.814, 2, 2
P value	0.4154
P value summary	ns
Significantly different (P < 0.05)?	No
Table Analyzed	Figure 5C A+C+
Column B	gNFATc2
vs.	vs.
Column A	Vector-Ctrl
Unpaired t test
P value	0.0049
P value summary	**
Significantly different (P < 0.05)?	Yes
One- or two-tailed P value?	Two-tailed
t, df	t=5.617 df=4
How big is the difference?
Mean ± SEM of column A	6.373 ± 0.8088, n=3
Mean ± SEM of column B	1.527 ± 0.3005, n=3
Difference between means	-4.847 ± 0.8629
95% confidence interval	-7.242 to -2.451
R squared (eta squared)	0.8875
F test to compare variances
F, DFn, Dfd	7.244, 2, 2
P value	0.2426
P value summary	ns
Significantly different (P < 0.05)?	No

## Sheet: Figure 7I
	NFATc2/Sh-Ctrl				NFATc2/Sh-SOX2-A				NFATc2/Sh-SOX2-B
% of cell	Exp#1	Exp#2	Exp#3	Exp#4	Exp#1	Exp#2	Exp#3	Exp#4	Exp#1	Exp#2	Exp#3	Exp#4
ALDH+	5.995	8.346	6.998	7.586	2.379	0.702	0.89	1.27	0.418	0.549	1.371	2.31
CD44+	98.12	96.17	92.25	94.75	93.32	90.695	80.718	90.695	81.839	82.948	97.63	82.948
ALDH+/CD44+	5.72	7.67	6.35	7.05	2.22	0.495	0.818	1.25	0.339	0.448	1.33	0.448
Statistical analysis performed by GraphPad Prism 7.0
Table Analyzed	Figure 5G A+		Table Analyzed	Figure 5G A+
Column B	NFATc2/Sh-SOX2-A		Column C	NFATc2/Sh-SOX2-B
vs.	vs.		vs.	vs.
Column A	NFATc2/Sh-Ctrl		Column A	NFATc2/Sh-Ctrl
Unpaired t test			Unpaired t test
P value	<0.0001		P value	<0.0001
P value summary	****		P value summary	****
Significantly different (P < 0.05)?	Yes		Significantly different (P < 0.05)?	Yes
One- or two-tailed P value?	Two-tailed		One- or two-tailed P value?	Two-tailed
t, df	t=9.52 df=6		t, df	t=9.183 df=6
How big is the difference?			How big is the difference?
Mean ± SEM of column A	7.231 ± 0.4959, n=4		Mean ± SEM of column A	7.231 ± 0.4959, n=4
Mean ± SEM of column B	1.31 ± 0.3753, n=4		Mean ± SEM of column C	1.162 ± 0.4369, n=4
Difference between means	-5.921 ± 0.6219		Difference between means	-6.069 ± 0.6609
95% confidence interval	-7.443 to -4.399		95% confidence interval	-7.687 to -4.452
R squared (eta squared)	0.9379		R squared (eta squared)	0.9336
F test to compare variances			F test to compare variances
F, DFn, Dfd	1.746, 3, 3		F, DFn, Dfd	1.288, 3, 3
P value	0.6585		P value	0.84
P value summary	ns		P value summary	ns
Significantly different (P < 0.05)?	No		Significantly different (P < 0.05)?	No
Table Analyzed	Figure 5G C+		Table Analyzed	Figure 5G C+
Column B	NFATc2/Sh-SOX2-A		Column C	NFATc2/Sh-SOX2-B
vs.	vs.		vs.	vs.
Column A	NFATc2/Sh-Ctrl		Column A	NFATc2/Sh-Ctrl
Unpaired t test			Unpaired t test
P value	0.0779		P value	0.0643
P value summary	ns		P value summary	ns
Significantly different (P < 0.05)?	No		Significantly different (P < 0.05)?	No
One- or two-tailed P value?	Two-tailed		One- or two-tailed P value?	Two-tailed
t, df	t=2.124 df=6		t, df	t=2.263 df=6
How big is the difference?			How big is the difference?
Mean ± SEM of column A	95.32 ± 1.235, n=4		Mean ± SEM of column A	95.32 ± 1.235, n=4
Mean ± SEM of column B	88.86 ± 2.783, n=4		Mean ± SEM of column C	86.34 ± 3.772, n=4
Difference between means	-6.466 ± 3.045		Difference between means	-8.981 ± 3.969
95% confidence interval	-13.92 to 0.9842		95% confidence interval	-18.69 to 0.7308
R squared (eta squared)	0.4291		R squared (eta squared)	0.4604
F test to compare variances			F test to compare variances
F, DFn, Dfd	5.074, 3, 3		F, DFn, Dfd	9.323, 3, 3
P value	0.2153		P value	0.0993
P value summary	ns		P value summary	ns
Significantly different (P < 0.05)?	No		Significantly different (P < 0.05)?	No
Was the pairing significantly effective?	Yes
Table Analyzed	Figure 5G A+C+		Table Analyzed	Figure 5G A+C+
Column B	NFATc2/Sh-SOX2-A		Column C	NFATc2/Sh-SOX2-B
vs.	vs.		vs.	vs.
Column A	NFATc2/Sh-Ctrl		Column A	NFATc2/Sh-Ctrl
Unpaired t test			Unpaired t test
P value	<0.0001		P value	<0.0001
P value summary	****		P value summary	****
Significantly different (P < 0.05)?	Yes		Significantly different (P < 0.05)?	Yes
One- or two-tailed P value?	Two-tailed		One- or two-tailed P value?	Two-tailed
t, df	t=9.736 df=6		t, df	t=12.57 df=6
How big is the difference?			How big is the difference?
Mean ± SEM of column A	6.698 ± 0.4229, n=4		Mean ± SEM of column A	6.698 ± 0.4229, n=4
Mean ± SEM of column B	1.196 ± 0.3748, n=4		Mean ± SEM of column C	0.6413 ± 0.231, n=4
Difference between means	-5.502 ± 0.5651		Difference between means	-6.056 ± 0.4819
95% confidence interval	-6.884 to -4.119		95% confidence interval	-7.235 to -4.877
R squared (eta squared)	0.9405		R squared (eta squared)	0.9634
F test to compare variances			F test to compare variances
F, DFn, Dfd	1.273, 3, 3		F, DFn, Dfd	3.351, 3, 3
P value	0.8474		P value	0.3471
P value summary	ns		P value summary	ns
Significantly different (P < 0.05)?	No		Significantly different (P < 0.05)?	No

## Sheet: Figure 7M
	Relative expression
PDCL#24	IgG			Anti-SOX2
	Exp#1	Exp#2	Exp#3	Exp#1	Exp#2	Exp#3
Site 1	1.94856	0.528697	1.51612	50.2062	72.0759	45.5566
Site 2	1.71712	0.616136	1.3269	275.943	177.602	195.551
Table Analyzed	Site 1 Fold enrichment			Table Analyzed	Site 2 Fold enrichment
Column B	anti-SOX2			Column B	anti-SOX2
vs.	vs.			vs.	vs.
Column A	IgG			Column A	IgG
Unpaired t test				Unpaired t test
P value	0.0026			P value	0.0021
P value summary	**			P value summary	**
Significantly different (P < 0.05)?	Yes			Significantly different (P < 0.05)?	Yes
One- or two-tailed P value?	Two-tailed			One- or two-tailed P value?	Two-tailed
t, df	t=6.671 df=4			t, df	t=7.115 df=4
How big is the difference?				How big is the difference?
Mean ± SEM of column A	1.331 ± 0.4202, n=3			Mean ± SEM of column A	1.22 ± 0.3223, n=3
Mean ± SEM of column B	55.95 ± 8.176, n=3			Mean ± SEM of column B	216.4 ± 30.24, n=3
Difference between means	54.62 ± 8.187			Difference between means	215.1 ± 30.24
95% confidence interval	31.89 to 77.34			95% confidence interval	131.2 to 299.1
R squared (eta squared)	0.9175			R squared (eta squared)	0.9268
F test to compare variances				F test to compare variances
F, DFn, Dfd	378.6, 2, 2			F, DFn, Dfd	8802, 2, 2
P value	0.0053			P value	0.0002
P value summary	**			P value summary	***
Significantly different (P < 0.05)?	Yes			Significantly different (P < 0.05)?	Yes
