# Supplementary material for: NFATc2 enhances tumor-initiating phenotypes through the NFATc2/SOX2/ALDH axis in lung adenocarcinoma
Source: eLife. 2017 Jul 24;6:e26733. doi: 10.7554/eLife.26733 (PMC5570574; doi:10.7554/eLife.26733)
Supplement: Figure 8—source data 1. — DOI: http://dx.doi.org/10.7554/eLife.26733.029 [file elife-26733-fig8-data1.xlsx]

## Sheet: Figure 8A
ROS %	APC
A549	1	2	3	average	STD	P
	% Gate				Fold chang (From mean of control)
A549	Exp#1	Exp#2	Exp#3	Mean	Exp#1	Exp#2	Exp#3	Mean	P value
Ctrl	76.1	80.6	71.2	75.9667	1.00176	1.06099	0.937253	1
CR	37.3	37	42	38.7667	0.491005	0.487056	0.552874	0.510312	0.0003
Table Analyzed	Figure 6A
Column B	CR
vs.	vs.
Column A	Ctrl
Unpaired t test
P value	0.0003
P value summary	***
Significantly different (P < 0.05)?	Yes
One- or two-tailed P value?	Two-tailed
t, df	t=11.77 df=4
How big is the difference?
Mean ± SEM of column A	1 ± 0.03573, n=3
Mean ± SEM of column B	0.5103 ± 0.02131, n=3
Difference between means	-0.4897 ± 0.0416
95% confidence interval	-0.6052 to -0.3742
R squared (eta squared)	0.9719
F test to compare variances
F, DFn, Dfd	2.811, 2, 2
P value	0.5247
P value summary	ns
Significantly different (P < 0.05)?	No

## Sheet: Figure 8B
	% Gate				Fold chang (From mean of control)
	Exp#1	Exp#2	Exp#3	Mean	Exp#1	Exp#2	Exp#3	Mean	P value
Sh-Ctrl	29.3	29.3	26.7	28.4333	1.03048	1.03048	0.939039	1.03048
Sh-NFATc2-A	50.6	49.8	50.3	50.2333	1.7796	1.75147	1.76905	1.76553	<0.0001
Sh-NFATc2-B	58.8	57.1	55.8	57.2333	2.068	2.00821	1.96249	2.0381	<0.0001
Statistical analysis performed by GraphPad Prism 7.0
Table Analyzed	Figure 6B		Table Analyzed	Figure 6B
Column B	Sh-NFATc2-A		Column C	Sh-NFATc2-B
vs.	vs.		vs.	vs.
Column A	Sh-Ctrl		Column A	Sh-Ctrl
Unpaired t test			Unpaired t test
P value	<0.0001		P value	<0.0001
P value summary	****		P value summary	****
Significantly different (P < 0.05)?	Yes		Significantly different (P < 0.05)?	Yes
One- or two-tailed P value?	Two-tailed		One- or two-tailed P value?	Two-tailed
t, df	t=24.29 df=4		t, df	t=23.47 df=4
How big is the difference?			How big is the difference?
Mean ± SEM of column A	1 ± 0.03048, n=3		Mean ± SEM of column A	1 ± 0.03048, n=3
Mean ± SEM of column B	1.767 ± 0.008205, n=3		Mean ± SEM of column C	2.013 ± 0.03055, n=3
Difference between means	0.7667 ± 0.03156		Difference between means	1.013 ± 0.04315
95% confidence interval	0.6791 to 0.8543		95% confidence interval	0.8931 to 1.133
R squared (eta squared)	0.9933		R squared (eta squared)	0.9928
F test to compare variances			F test to compare variances
F, DFn, Dfd	13.8, 2, 2		F, DFn, Dfd	1.004, 2, 2
P value	0.1351		P value	0.9978
P value summary	ns		P value summary	ns
Significantly different (P < 0.05)?	No		Significantly different (P < 0.05)?	No

## Sheet: Figure 8C
	% Gate				Fold chang (From mean of control)
	Exp#1	Exp#2	Exp#3	Mean	Exp#1	Exp#2	Exp#3	Mean	P value
Sh-Ctrl	44.2	43.4	46	44.5333	0.992515	0.974551	1.03293	1
Sh-NFATc2-A	56.1	57.4	59.3	57.6	1.25973	1.28892	1.33159	1.29341	0.0004
Sh-NFATc2-B	64.1	61.5	61.7	62.4333	1.43937	1.38099	1.38548	1.40195	<0.0001
Table Analyzed	Figure 6C		Table Analyzed	Figure 6C
Column B	Sh-NFATc2-A		Column C	Sh-NFATc2-B
vs.	vs.		vs.	vs.
Column A	Sh-Ctrl		Column A	Sh-Ctrl
Unpaired t test			Unpaired t test
P value	0.0004		P value	<0.0001
P value summary	***		P value summary	****
Significantly different (P < 0.05)?	Yes		Significantly different (P < 0.05)?	Yes
One- or two-tailed P value?	Two-tailed		One- or two-tailed P value?	Two-tailed
t, df	t=10.83 df=4		t, df	t=15.77 df=4
How big is the difference?			How big is the difference?
Mean ± SEM of column A	1 ± 0.01726, n=3		Mean ± SEM of column A	1 ± 0.01726, n=3
Mean ± SEM of column B	1.293 ± 0.02086, n=3		Mean ± SEM of column C	1.402 ± 0.01876, n=3
Difference between means	0.2934 ± 0.02708		Difference between means	0.4019 ± 0.02549
95% confidence interval	0.2182 to 0.3686		95% confidence interval	0.3312 to 0.4727
R squared (eta squared)	0.967		R squared (eta squared)	0.9842
F test to compare variances			F test to compare variances
F, DFn, Dfd	1.461, 2, 2		F, DFn, Dfd	1.18, 2, 2
P value	0.8128		P value	0.9172
P value summary	ns		P value summary	ns
Significantly different (P < 0.05)?	No		Significantly different (P < 0.05)?	No

## Sheet: Figure 8D
	% Gate				Fold chang (From mean of control)
HCC827	Exp#1	Exp#2	Exp#3	Mean	Exp#1	Exp#2	Exp#3	Mean	P value
Vector Ctrl	24.3	33.8	28.9	29	0.837931	1.16552	0.996552	1
gNFATc2	42.9	42.1	44.6	43.2	1.47931	1.45172	1.53793	1.48966	0.0075
Table Analyzed	Figure 6D
Column B	gNFATc2
vs.	vs.
Column A	Vector Ctrl
Unpaired t test
P value	0.0075
P value summary	**
Significantly different (P < 0.05)?	Yes
One- or two-tailed P value?	Two-tailed
t, df	t=5 df=4
How big is the difference?
Mean ± SEM of column A	29 ± 2.743, n=3
Mean ± SEM of column B	43.2 ± 0.7371, n=3
Difference between means	14.2 ± 2.84
95% confidence interval	6.314 to 22.09
R squared (eta squared)	0.8621
F test to compare variances
F, DFn, Dfd	13.85, 2, 2
P value	0.1347
P value summary	ns
Significantly different (P < 0.05)?	No

## Sheet: Figure 8J
	% Gate					Fold chang (From mean of control)
	Exp#1	Exp#2	Exp#3	Exp#4	Mean	Exp#1	Exp#2	Exp#3	Exp#4	Mean	P value
RFP	70.4	67.7	67.4	66.6	68.025	1.03491	0.995222	0.990812	0.979052	1
NFATc2	50.3	53.9	53.7	50.7	52.15	0.739434	0.792356	0.789416	0.745314	0.76663	<0.0001
NFATc2/shSOX2-A	88.7	91.4	92.7	82.7	88.875	1.30393	1.34362	1.36273	1.21573	1.3065	<0.0001
NFATc2/shSOX2-B	84	95.2	95.7	71.4	86.575	1.23484	1.39949	1.40684	1.04961	1.27269	0.001
Table Analyzed	Figure 6J		Table Analyzed	Figure 6J		Table Analyzed	Figure 6J
Column B	NFATc2		Column C	NFATc2/shSOX2-A		Column D	NFATc2/shSOX2-B
vs.	vs.		vs.	vs.		vs.	vs.
Column A	RFP		Column B	NFATc2		Column B	NFATc2
Unpaired t test			Unpaired t test			Unpaired t test
P value	<0.0001		P value	<0.0001		P value	0.001
P value summary	****		P value summary	****		P value summary	**
Significantly different (P < 0.05)?	Yes		Significantly different (P < 0.05)?	Yes		Significantly different (P < 0.05)?	Yes
One- or two-tailed P value?	Two-tailed		One- or two-tailed P value?	Two-tailed		One- or two-tailed P value?	Two-tailed
t, df	t=12.56 df=6		t, df	t=15.19 df=6		t, df	t=5.921 df=6
How big is the difference?			How big is the difference?			How big is the difference?
Mean ± SEM of column A	1 ± 0.01213, n=4		Mean ± SEM of column B	0.7666 ± 0.01407, n=4		Mean ± SEM of column B	0.7666 ± 0.01407, n=4
Mean ± SEM of column B	0.7666 ± 0.01407, n=4		Mean ± SEM of column C	1.307 ± 0.03264, n=4		Mean ± SEM of column D	1.273 ± 0.0843, n=4
Difference between means	-0.2334 ± 0.01858		Difference between means	0.5399 ± 0.03554		Difference between means	0.5061 ± 0.08546
95% confidence interval	-0.2788 to -0.1879		95% confidence interval	0.4529 to 0.6268		95% confidence interval	0.2969 to 0.7152
R squared (eta squared)	0.9634		R squared (eta squared)	0.9747		R squared (eta squared)	0.8539
F test to compare variances			F test to compare variances			F test to compare variances
F, DFn, Dfd	1.346, 3, 3		F, DFn, Dfd	5.382, 3, 3		F, DFn, Dfd	35.89, 3, 3
P value	0.8128		P value	0.2004		P value	0.015
P value summary	ns		P value summary	ns		P value summary	*
Significantly different (P < 0.05)?	No		Significantly different (P < 0.05)?	No		Significantly different (P < 0.05)?	Yes

## Sheet: Figure 8K
	% Gate				Fold chang (From mean of control)
	Exp#1	Exp#2	Exp#3	Mean	Exp#1	Exp#2	Exp#3	Mean	P value
RFP	67.9	73.5	75.4	72.2667	0.939576	1.01707	1.04336	1
NFATc2	54.8	62	51.5	56.1	0.758303	0.857934	0.712638	0.776292	0.0135
NFATc2/siALDH1A1-1	91.8	97.6	97.1	95.5	1.2703	1.35055	1.34363	1.32149	0.0004
NFATc2/siALDH1A1-2	94.9	88.9	93.4	92.4	1.31319	1.23017	1.29244	1.2786	0.0004
Table Analyzed	Figure 6K			Table Analyzed	Figure 6K			Table Analyzed	Figure 6K
Column B	NFATc2			Column C	NFATc2/siALDH1A1-1			Column D	NFATc2/siALDH1A1-2
vs.	vs.			vs.	vs.			vs.	vs.
Column A	RFP			Column B	NFATc2			Column B	NFATc2
Unpaired t test				Unpaired t test				Unpaired t test
P value	0.0135			P value	0.0004			P value	0.0005
P value summary	*			P value summary	***			P value summary	***
Significantly different (P < 0.05)?	Yes			Significantly different (P < 0.05)?	Yes			Significantly different (P < 0.05)?	Yes
One- or two-tailed P value?	Two-tailed			One- or two-tailed P value?	Two-tailed			One- or two-tailed P value?	Two-tailed
t, df	t=4.22 df=4			t, df	t=10.91 df=4			t, df	t=10.12 df=4
How big is the difference?				How big is the difference?				How big is the difference?
Mean ± SEM of column A	1 ± 0.03115, n=3			Mean ± SEM of column B	0.7763 ± 0.0429, n=3			Mean ± SEM of column B	0.7763 ± 0.0429, n=3
Mean ± SEM of column B	0.7763 ± 0.0429, n=3			Mean ± SEM of column C	1.321 ± 0.02567, n=3			Mean ± SEM of column D	1.279 ± 0.02494, n=3
Difference between means	-0.2237 ± 0.05301			Difference between means	0.5452 ± 0.04999			Difference between means	0.5023 ± 0.04962
95% confidence interval	-0.3709 to -0.07653			95% confidence interval	0.4064 to 0.684			95% confidence interval	0.3645 to 0.6401
R squared (eta squared)	0.8166			R squared (eta squared)	0.9675			R squared (eta squared)	0.9624
F test to compare variances				F test to compare variances				F test to compare variances
F, DFn, Dfd	1.896, 2, 2			F, DFn, Dfd	2.791, 2, 2			F, DFn, Dfd	2.957, 2, 2
P value	0.6905			P value	0.5275			P value	0.5054
P value summary	ns			P value summary	ns			P value summary	ns
Significantly different (P < 0.05)?	No			Significantly different (P < 0.05)?	No			Significantly different (P < 0.05)?	No
